# Supplementary material for: Stress and interferon signalling-mediated apoptosis contributes to pleiotropic anticancer responses induced by targeting NGLY1
Source: PubMed Central journal article supplement (PMC6288164; doi:10.1038/s41416-018-0265-9), 2018-11-02
Supplement: 41416_2018_265_MOESM1_ESM.pdf [file 41416_2018_265_MOESM1_ESM.pdf]

## **Stress and interferon signaling-mediated apoptosis contributes to pleiotropic anticancer responses induced by targeting NGLY1**

Ashwini Zolekar<sup>1†</sup>, Victor J.T. Lin<sup>1†</sup>, Nigam M. Mishra<sup>1</sup>, Yin Ying Ho<sup>2</sup>, Hamed S. Hayatshahi<sup>1</sup>, Abhishek Parab<sup>3</sup>, Rohit Sampat<sup>1</sup>, Xiaoyan Liao<sup>4</sup>, Peter Hoffmann<sup>2,5</sup>, Jin Liu<sup>1</sup>, Kyle A. Emmitte<sup>1</sup>, Yu-Chieh Wang<sup>1\*</sup>

<sup>1</sup> Department of Pharmaceutical Sciences, UNT System College of Pharmacy, University of North Texas Health Science Center, Fort Worth, TX, USA

<sup>2</sup> Adelaide Proteomics Centre, The University of Adelaide, Adelaide, Australia

<sup>3</sup> Department of Mathematics, Purdue University, West Lafayette, Indiana, USA

<sup>4</sup> Department of Pathology, University of California, San Diego, San Diego, California, USA

<sup>5</sup> Future Industries Institute, University of South Australia, Adelaide, Australia

\*To whom correspondence should be addressed:

Yu-Chieh Wang, Ph.D.  
Department of Pharmaceutical Sciences  
The University of North Texas Health Science Center  
3500 Camp Bowie Boulevard, RES-314G  
Fort Worth, Texas 76107  
Tel: 1-(817) 735-2944  
Fax: 1-(817) 735-2603  
Email: [yu-chieh.wang@unthsc.edu](mailto:yu-chieh.wang@unthsc.edu)

†A.Z. and V.J.T.L. equally contributed to this work.

## **Supplementary Information:**

### **Materials and Methods**

#### ***Knockdown of NGLY1 and GADD153 (DDIT3)***

NGLY1-shRNA645:

5'CCGAGUUUCAAAUAACAAUCAAUAGUGAAGCCACAGAUGUAUUGAUUGUUAUU  
UGAAACUCGAU<sup>3'</sup>, NGLY1-shRNA647:

5'AAAGCAUUACUUCGAGACACUAUAGUGAAGCCACAGAUGUAUAGUGUCUCGAA  
GUA AUGCUUCU<sup>3'</sup>, DDIT3-shRNA301:

5'AAGGUCCUGUCUUCAGAUGAAAUAGUGAAGCCACAGAUGUAUUUCAUCUGAAG  
ACAGGACCUCU<sup>3'</sup>, DDIT3-shRNA303:

5'AGAGAAAGAACAGGAGAAUGAAUAGUGAAGCCACAGAUGUAUUCUCCUG  
UUCUUUCUCCU<sup>3'</sup>, DDIT3-shRNA304:

5'AGUCCUGUCUUCAGAUGAAAAUAGUGAAGCCACAGAUGUAUUUUUCAUCUGA  
AGACAGGACCU<sup>3'</sup>

#### ***Immunohistochemistry (IHC) and Fluorescence Staining***

For the staining of pluripotency biomarkers in hPSCs and their differentiated derivatives, cells were plated into 24-well plates, fixed and permeabilized and incubated with primary antibodies against specific pluripotency biomarkers and fluorophore-conjugated secondary antibodies (Thermo Fisher Scientific, Carlsbad, CA). For the IHC staining of FFPE tissue sections, tissue sections were dewaxed, rehydrated, subjected to antigen retrieval using a universal antigen retrieval reagent (R&D Systems, Minneapolis, MN), and reacted with a primary antibody against human NGLY1 (Millipore Sigma, St. Louis, MO) at 4°C for overnight. After thorough washing with PBS containing 0.2% Tween-20 (PBST; Millipore Sigma, St. Louis, MO), the tissue samples were reacted with a HRP-conjugated secondary antibody (Jackson ImmunoResearch Laboratories, West Grove, PA) at room temperature for 2 hours, washed with PBST, processed using an AEC peroxidase substrate kit (Vector Laboratories, Burlingame, CA) and subsequently stained with Mayer's hematoxylin solution (Millipore Sigma, St. Louis, MO). The stained tissue samples were mounted with cover slips and read by a pathologist who is experienced in the identification of cancer cells in tissue sections with IHC staining.

### ***Flow Cytometry***

For quantifying the percentages of apoptotic cells in cell samples, samples (~1 x 10<sup>6</sup> cells per sample) stained with Annexin V-Alexa Fluor 647 (Thermo Fisher Scientific, Carlsbad, CA) according to the manufacturer's instruction were analyzed using a SH800Z cell sorter (Sony Biotechnology, San Jose, CA). In addition to the Annexin V-Alexa Fluor 647, anti-FLAG rat IgG-Alexa Fluor 555 (Thermo Fisher Scientific, Carlsbad, CA) was used for labeling fixed cells with the overexpression of FLAG-tagged human NGLY1 prior to cytometry analysis in the rescue study.

### ***Cell Viability Test***

Cells were seeded into 96-well plates (2,500-5,000 cells/well, depending on cell types), incubated overnight, and treated as indicated. If DMSO was used as a vehicle to dissolve compounds and generate stock compound solutions for drug treatment, control groups received DMSO (0.1%, final concentration). After treatment, cells were incubated in FBS-free medium containing 0.4 mg/mL MTT (3-[4,5-dimethyl- thiazol-2-yl]-2,5-diphenyl-2H-tetrazolium bromide; TCI America, Portland, OR) at 37°C for 1 hour. Reduced MTT was solubilized in DMSO for determination of absorbance at 570 nm. Absorbance of reduced MTS was directly measured in the reaction medium at 490 nm. The relative cell viability in each treatment condition was calculated based on absorbance values. The combination indices (C.I.) of cell viability suppression induced by combinatorial treatment were calculated using Calcsyn 2.0. C.I. values less than 1 are generally considered as synergistic effects from the combinatorial treatment. The lower a C.I. value gets, the stronger the synergistic effect is.

### ***Gene Expression Analysis by qRT-PCR and Microarrays***

Total RNA was isolated from cell samples using the mirVana miRNA Isolation Kit (Thermo Fisher Scientific, Carlsbad, CA). The quality of each RNA samples was determined using an Agilent 2200 Tape Station system (Agilent, Santa Clara, CA) for RNA integrity analysis. Samples with RIN<sup>o</sup> numbers above 7 were chosen to move forward with global gene expression profiling. The iScript Reverse Transcription Supermix (Bio-Rad, Hercules, CA) was used to generate the cDNA of total RNA samples. Global gene expression profiling was performed using HT-12v4 Human Gene Expression Bead Chips and a HiScan array scanning system (Illumina, Hayward, CA), according to the manufacturer's instructions. The gene expression

array data have been deposited with links to an accession number GSE106936 in the Gene Expression Omnibus (GEO). Data were filtered for detection  $P$  value  $<0.01$  in GenomeStudio (Illumina, Hayward, CA), and normalized using the LUMI package with RSN (Robust spline normalization) algorithm in R. The limma package in R was used for multivariate analysis to identify the top differentially expressed genes ( $P<0.01$ ). The pheatmap package was used for clustering analysis and generating heat map representations in R. The volcano plots were obtained using the limma package in conjunction with the ggplot2 package in R. The ontology analysis of differentially expressed genes was performed using the PANTHER 12.0 (<http://pantherdb.org/about.jsp>).

### ***In vivo Studies***

Six-week-old female NOD.CB17-*Prkdc*<sup>scid</sup>/J mice (The Jackson Laboratory, Bar Harbor, ME) were group-housed under conditions of constant photoperiod (12 hours light: 12 hours dark) with *ad libitum* access to sterilized food and water. Since the animal work in this study was completed using an animal study service provided by the translational core laboratory at the University of Maryland, Baltimore, all experimental procedures and protocols utilizing mice were approved by the Institutional Animal Care and Use Committee at the University of Maryland. The clones of SK-MEL-2 cells that carry inducible NT-shRNA and NGLY1-shRNA645 were used in the animal studies. Each mouse was subcutaneously inoculated with  $1 \times 10^6$  cancer cells in a total volume of 0.1 mL serum-free medium containing 50% Matrigel (Corning, Tewksbury, MA). As tumors became established (mean starting tumor volume:  $154.2 \pm 78.3 \text{ mm}^3$  for NT-shRNA and  $141.8 \pm 48.2 \text{ mm}^3$  for NGLY1-shRNA645) in mice, their *ad libitum* access to water was discontinued. Subsequently, sterilized water containing 0.5 mg/ml doxycycline and 5% sucrose freshly prepared every other day in bottles was provided to the tumor-bearing animals for 5 weeks. Mice bearing tumors ( $n=10$  for NT-shRNA and  $n=8$  for NGLY1-shRNA645) were included in the study. Tumors were measured weekly using calipers and their volumes calculated using a standard formula: width<sup>2</sup> x length x 0.52. Body weights were measured weekly. At terminal sacrifice, complete necropsies were performed on all mice and tumors were harvested. A portion of each tumor was frozen in liquid nitrogen for western blotting analysis and the remainder was fixed in 10% formalin for immunohistochemical or immunofluorescence staining purposes.

### ***Production of recombinant human NGLY1 and RNase B deglycosylation assay***

FLAG-tagged human NGLY1 was overexpressed by the transduction of the pLenti expression vector that carries a Myc-DDK-tagged-human NGLY1 open reading frame in HEK293T cells. Anti-FLAG magnetic beads (OriGene Technologies, Rockville, MD) were used to react with the lysate of HEK293T cells overnight at 4°C in the presence of pan-protease inhibitors to purify the FLAG-tagged NGLY1. The magnetic beads were thoroughly washed using 0.5% Tween 20 in PBS for three times to minimize non-specific binding. The enrichment of recombinant human NGLY1 was checked by western blotting of NGLY1 in the pull-down fraction. To perform RNase B deglycosylation assays, purified human NGLY1 on an equal volume of magnetic beads was incubated with PBS containing each of the indicated small molecules and control vehicle (DMSO) at 37°C for 2 hours. The magnetic beads were then collected and resuspended in PBS containing 0.05% NP-40. Each magnetic bead suspension was mixed with 1 $\mu$ g RNase B (Millipore Sigma, St. Louis, MO) that was pre-denatured using 5mM DTT in the presence of 8M urea at 42°C for 1 hour followed by the treatment of 25mM iodoacetamide at room temperature for 1 hour and buffer exchange into PBS using Zeba 7K MWCO spin columns (Thermo Fisher Scientific, Carlsbad, CA). The mixtures of magnetic bead suspension and denatured RNase B were left at 37°C for 16 hours. The proteins in each mixture were resolved by SDS-PAGE and visualized using SYPRO Ruby gel stain (Thermo Fisher Scientific, Carlsbad, CA).

### ***Proteomics Analysis***

Cell samples were rinsed with PBS, harvested and snap-frozen. Each cell sample were mixed with 100 $\mu$ l of resuspension buffer containing 8M urea/1% (w/v) SDS/100 mM NH<sub>4</sub>HCO<sub>3</sub> and 1% protease inhibitor cocktail (Millipore Sigma, St. Louis, MO) and subsequently sonicated for 5 minutes on ice. Reduction was performed by adding 5 $\mu$ l of 1M DTT and incubated for 1 hour at 30°C. Cell debris was removed by centrifugation at 14,000 x g for 5 minutes at room temperature. Vivacon spin column (30 kDa MWCO; Sartorius, Göttingen Germany) was washed using 100  $\mu$ L of 8 M urea/100 mM NH<sub>4</sub>HCO<sub>3</sub> and spun for 10 min at 14,000 x g at room temperature. After reduction, a reduced protein sample was transferred into a washed spin column and spun as described above. The spin column was washed once by adding 8M urea/100 mM NH<sub>4</sub>HCO<sub>3</sub> and spinning for 10 min at 14,000 x g at room temperature. One hundred microliters of 55mM IAA/100mM NH<sub>4</sub>HCO<sub>3</sub> was added to the spin column and allowed to

incubate with reduced proteins at room temperature for 20 minutes in the dark. IAA was removed by centrifugation and the spin column was washed twice with 8M urea/100mM  $\text{NH}_4\text{HCO}_3$ , followed by twice with 100 $\mu\text{L}$  of 50mM  $\text{NH}_4\text{HCO}_3$ . One hundred microliters of trypsin solution containing 5 $\mu\text{g}$  of trypsin made in 10mM  $\text{NH}_4\text{HCO}_3$  was added to the spin column and allowed to incubate at 37°C overnight. After incubation, the collection tube was replaced with a new one and 50 $\mu\text{L}$  of 1% (v/v) formic acid added into the spin column and spun at 14,000 x g for 10 min. This step was repeated once. Flow through containing digested peptides was transferred to an HPLC vial and allowed to dry to completeness in a speed vacuum system. Digested peptides were resuspended in 100 $\mu\text{L}$  of 3% (v/v) ACN and peptide concentration was measured on a NanoDrop™ 2000/2000c Spectrophotometer (Thermo Fisher Scientific, Carlsbad, CA) at 205nm wavelength. All samples were acidified to final concentration of 0.1% (v/v) trifluoroacetic acid.

LC-MS/MS of digested proteins was performed using an Ultimate 3000 nano-flow system (Thermo Fisher Scientific, Carlsbad, CA) coupled to a LTQ XL Orbitrap ETD MS instrument (Thermo Fisher Scientific, Carlsbad, CA). Three biological and two technical replicates per sample were performed and randomly introduced into the LC system to minimize biological and technical variability introduced by the LC-MS system. One microliter of digested peptides (equivalent to 2 $\mu\text{g}$ ) was drawn into a 1 $\mu\text{l}$  sample loop at 300nl/min flow rate using buffer A (2% (v/v) ACN/0.1% (v/v) FA) and sample directly flow from sample loop onto a trapping column (Acclaim PepMap100, C18, pore size 100Å, particle size 3 $\mu\text{m}$ , 75 $\mu\text{m}$  ID  $\times$  2 cm length; Thermo Fisher Scientific, Carlsbad, CA) and a Acclaim PepMap RSLC column (C18, pore size 100Å, particle size 2 $\mu\text{m}$ , 75 $\mu\text{m}$  internal diameter  $\times$  15cm length; Thermo Fisher Scientific, Carlsbad, CA). Peptide separation started after 15 minutes using a linear gradient of 5 to 45% (v/v) buffer B (80% (v/v) ACN/0.1% (v/v) FA) over 90 min, wash step of 90% buffer B for 10 minutes before column equilibration for 20 minutes in 5% buffer B. A total of 120 min of chromatographic time. LC and MS acquisition were controlled by Xcalibur version 2.1 (Thermo Fisher Scientific, Carlsbad, CA). The LTQ XL Orbitrap MS was operated in the data-dependent mode and spectra were acquired in positive mode in full MS scans in the mass range of 300 to 2000  $m/z$  at a resolution of 60000 in the FT mode. The ten most intense precursor ions were then selected for isolation and subjected to CID fragmentation using a dynamic exclusion of 5 seconds. Dynamic exclusion criteria included a minimum relative signal intensity of 1000, and

$\geq 2$  positive charge state. An isolation width of 3.0  $m/z$  was used with a normalized collision energy 35.

Spectra were analyzed using the MaxQuant software (version 1.5.3.17) with the Andromeda search engine [1] against the most recent version of UniProt human database. The standard Orbitrap settings in MaxQuant were used with a MS mass error tolerance of 20 ppm and MS/MS mass error tolerance of 0.5 Da. The variable modification of oxidation of methionine and HexNAc of asparagine, and the fixed modification of carbamidomethyl of cysteines were specified, with the digestion enzyme specified as trypsin. LFQ was activated with minimum ratio count of 2 and allowed match between runs as well as unidentified features. The LC-MS/MS runs were normalized according to the least overall proteome variation where majority of the proteins do not change between the samples. The false discovery rate (FDR) was set to 5% for both proteins and peptides, with a minimum peptide length of 7 amino acids. Only unique and razor peptides were used when reporting protein identifications.

### ***Procedures of Chemical Synthesis and Characterization***

**Synthesis and Purification.** Air sensitive reactions were carried out under a nitrogen atmosphere (Airgas Catalog No. NI UHP300). The following solvents were employed for chemical reactions: dichloromethane (99.9%, Extra Dry, AcroSeal™, Acros Organics Catalog No. 610300010), *N,N*-dimethylformamide (Anhydrous, 99.8%, packaged under Argon in resealable ChemSeal™ bottles, Catalog No. 43997) and ethyl alcohol (Absolute, anhydrous, ACS/USP grade, Pharmco-AAPER Catalog No. 111000200). The following solvents were employed for compound extractions: ethyl acetate (Certified ACS grade, Fisher Chemical Catalog No. E145-20) and dichloromethane (Not Stabilized, HPLC grade, Fisher Chemical Catalog No. D150-4). Saturated aqueous NaHCO<sub>3</sub> was prepared from deionized water and sodium bicarbonate (Reagent grade, Fisher Chemical Catalog No. S25533B). Brine was prepared from deionized water and sodium chloride (Reagent grade, Fisher Chemical Catalog No. S25541B). Organic extracts were dried over anhydrous sodium sulfate (Lab grade, Fisher Chemical Catalog No. S25568A). Thin layer chromatography (TLC) was conducted on glass plates coated with Silica Gel 60 F<sub>254</sub> from Millipore Sigma (Catalog No. 1057150001). Normal phase flash chromatography was carried out on either a CombiFlash® EZ Prep or CombiFlash® Rf+ automated flash chromatography system, both from Teledyne ISCO. Normal phase flash

chromatography was carried out using RediSep<sup>®</sup> Rf normal phase disposable flash columns (40-60 micron) from Teledyne ISCO (Catalog Nos. 69-2203-304, 69-2203-312, 69-2203-324, 69-2203-340, 69-2203-380, and 69-2203-320). The following solvents were employed for TLC and normal phase chromatography: hexanes (Certified ACS grade, Fisher Chemical Catalog No. H292-20), ethyl acetate (Certified ACS grade, Fisher Chemical Catalog No. E145-20), dichloromethane (Not Stabilized, HPLC grade, Fisher Chemical Catalog No. D150-4), and methanol (HPLC grade, Fisher Chemical, Catalog No. A452-4). Reverse phase chromatography was carried out on a CombiFlash<sup>®</sup> EZ Prep automated flash chromatography system using a RediSep<sup>®</sup> Rf C18 column from Teledyne ISCO (Catalog No. 69-2203-413). Reverse phase preparative HPLC was carried out on a CombiFlash<sup>®</sup> EZ Prep automated flash chromatography system equipped with a RediSep<sup>®</sup> Prep C18 10 x 250 mm, 100Å, 5 µm HPLC preparative column from Teledyne ISCO (Catalog No. 692203809). The following solvents were employed for reverse phase chromatography: acetonitrile (HPLC grade, Fisher Chemical Catalog No. A998SK-4) and water purified using a Milli-Q<sup>®</sup> Advantage A10 Water Purification System from Millipore Sigma.

**Characterization.** All NMR spectra were recorded on a 300 MHz Bruker Fourier 300HD NMR spectrometer equipped with a dual <sup>1</sup>H and <sup>13</sup>C probe with Z-Gradient and automatic tuning and matching, full computer control of all shims with TopShim<sup>™</sup>, 24-sample SampleCase<sup>™</sup> automation system, and TopSpin<sup>™</sup> software. All NMR samples were prepared with either methyl sulfoxide-d<sub>6</sub> with 0.03% TMS, 99.8 atom % D, Acros Organics Catalog No. 360000100) or chloroform-d with 0.03% TMS, 99.8+ atom % D, Acros Organics Catalog No. 209561000). <sup>1</sup>H and <sup>13</sup>C chemical shifts are reported in δ values in ppm downfield with tetramethylsilane (TMS) as the internal standard. Data are reported as follows: chemical shift, multiplicity (s = singlet, d = doublet, t = triplet, q = quartet, b = broad, m = multiplet), integration, coupling constant (Hz). High resolution mass spectrometry was conducted on an Agilent 6230 Accurate-Mass Time-of-Flight (TOF) LC/MS with ESI source equipped with MassHunter Walkup software. MS parameters were as follows: fragmentor: 175 V, capillary voltage: 3500 V, nebulizer pressure: 35 psig, drying gas flow: 11 L/min, drying gas temperature: 325 °C. Samples were introduced via an Agilent 1260 Infinity UHPLC comprised of a G4225A HiP Degasser, G1312B binary pump, G1367E ALS, G1316A TCC, and G1315C DAD VL+ with a 5 µL semi-micro flow cell with a 6 mm path length. UV absorption was observed at 220 nm and 254 nm



with a 4 nm bandwidth. Column: Agilent Zorbax SB-C18, Rapid Resolution HT, 1.8  $\mu\text{m}$ , 2.1 x 50 mm. Gradient conditions: Hold at 5%  $\text{CH}_3\text{CN}$  in  $\text{H}_2\text{O}$  (0.1% formic acid) for 1.0 min, 5% to 95%  $\text{CH}_3\text{CN}$  in  $\text{H}_2\text{O}$  (0.1% formic acid) over 5 min, hold at 95%  $\text{CH}_3\text{CN}$  in  $\text{H}_2\text{O}$  (0.1% formic acid) for 1.0 min, 0.5 mL/min. All analogs were at least 95% pure according to these analytical methods.

**Synthesis of Analogs.** Analogs were prepared according to the scheme pictured below.

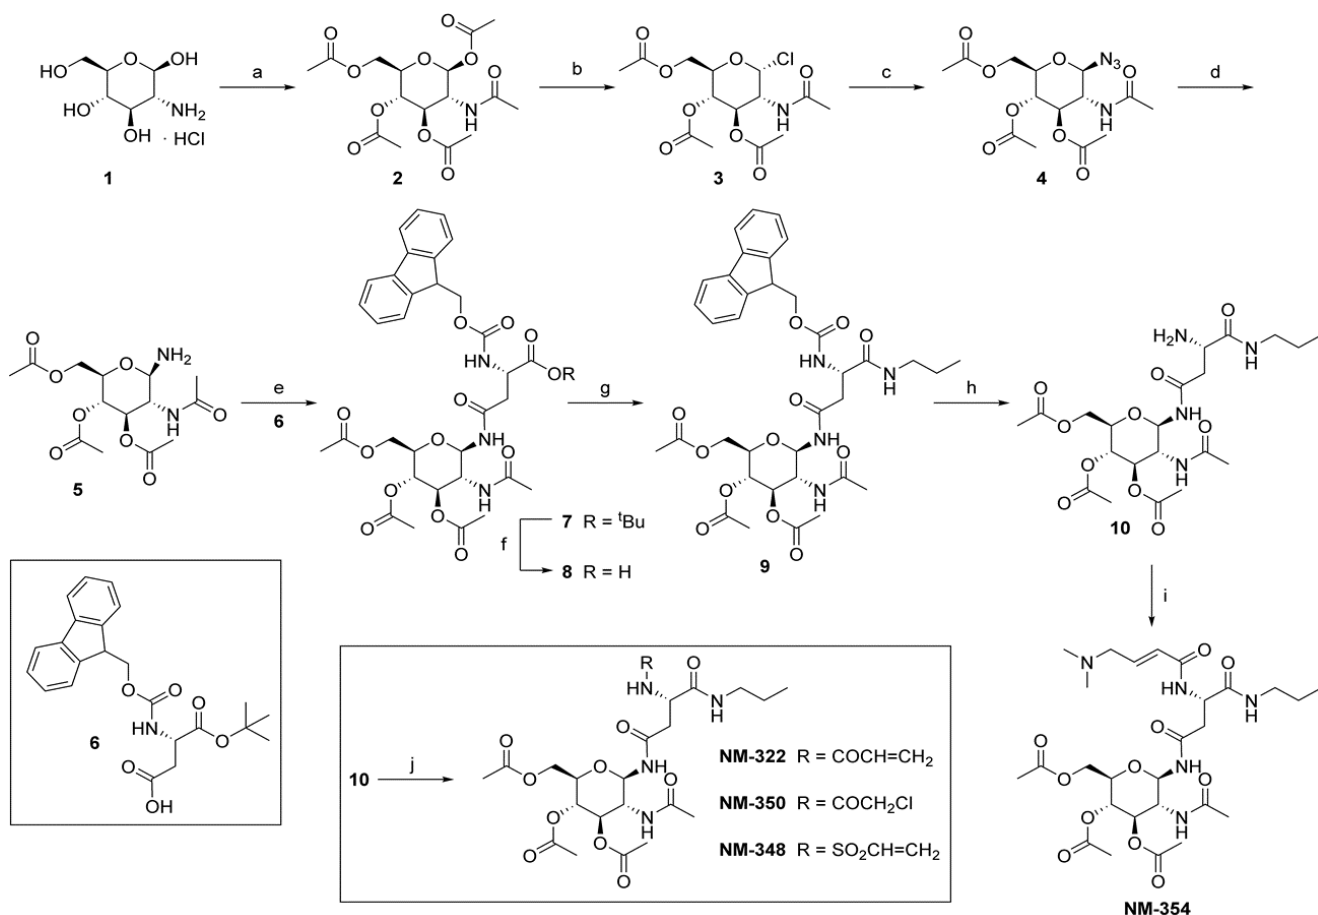

**Reagents and Conditions:** (a) acetic anhydride, pyridine, 82%; (b)  $\text{HCl}(\text{g})$ , acetic anhydride, 0  $^\circ\text{C}$  to r.t., 65%; (c)  $(n\text{-Bu})_4\text{NHSO}_4$ ,  $\text{NaN}_3$ ,  $\text{CH}_2\text{Cl}_2$ , sat'd aq.  $\text{NaHCO}_3$ , 89%; (d)  $\text{HCO}_2\text{NH}_4$ , 10%  $\text{Pd/C}$ ,  $\text{EtOH}$ ; (e) DIEA, HATU,  $\text{CH}_2\text{Cl}_2$ , 68% over 2 steps; (f)  $\text{F}_3\text{CCO}_2\text{H}$ ,  $\text{CH}_2\text{Cl}_2$ , 0  $^\circ\text{C}$  to r.t., 86%; (g)  $n\text{-PrNH}_2$ , DIEA, HATU,  $\text{CH}_2\text{Cl}_2$ ; (h) piperidine, DMF; (i) 4-(dimethylamino)but-2-enoic acid hydrochloride, DIEA, HATU,  $\text{CH}_2\text{Cl}_2$ , 30%; (j)  $\text{ClC}(\text{O})\text{CH}=\text{CH}_2$  (for NM-322),  $\text{ClC}(\text{O})\text{CH}_2\text{Cl}$  (for NM-350), or  $\text{ClSO}_2\text{CH}_2\text{CH}_2\text{Cl}$  (for NM-348), DIEA,  $\text{CH}_2\text{Cl}_2$ , 0  $^\circ\text{C}$  to r.t., 20-30%.

**(2*S*,3*R*,4*R*,5*S*,6*R*)-3-Acetamido-6-(acetoxymethyl)tetrahydro-2*H*-pyran-2,4,5-triyl triacetate**  
**(2)**

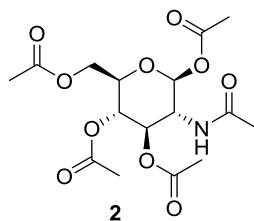

According to the method previously described [2], D-(+)-Glucosamine hydrochloride (USP grade, Chem-Impex Catalog No. 01450) (1.00 g, 4.64 mmol), pyridine (Anhydrous, DriSolv<sup>®</sup>, Millipore Sigma Catalog No. PX2012) (10 mL), and acetic anhydride (Certified ACS grade, Fisher Chemical Catalog No. A10-500) (2.62 mL, 27.9 mmol) were placed in a round bottom flask. The mixture was stirred at room temperature for 12 h. The reaction was monitored by TLC. After completion of the reaction, cold water was added and the resulting solution was extracted with ethyl acetate. The organic layer was washed with saturated aqueous NaHCO<sub>3</sub>, brine, dried over anhydrous Na<sub>2</sub>SO<sub>4</sub>, and concentrated *in vacuo*. The crude product was purified by flash chromatography using hexane and ethyl acetate as eluent and obtained as a white solid (1.48 g, 82%): <sup>1</sup>H NMR (300 MHz, CDCl<sub>3</sub>) δ 6.18 (d, *J* = 3.6 Hz, 1H), 5.54 (d, *J* = 8.9 Hz, 1H), 5.31 – 5.12 (m, 2H), 4.49 (td, *J* = 9.7, 9.7, 3.8 Hz, 1H), 4.26 (dd, *J* = 12.4, 4.0 Hz, 1H), 4.09 – 3.98 (m, 2H), 2.20 (s, 3H), 2.10 (s, 3H), 2.06 (s, 3H), 2.05 (s, 3H), 1.95 (s, 3H); <sup>13</sup>C NMR (75 MHz, CDCl<sub>3</sub>) δ 171.64, 170.68, 169.97, 169.09, 168.65, 90.65, 70.61, 69.67, 67.46, 61.51, 50.99, 23.02, 20.93, 20.70, 20.69, 20.56.

**(2*R*,3*S*,4*R*,5*R*,6*R*)-5-Acetamido-2-(acetoxymethyl)-6-chlorotetrahydro-2*H*-pyran-3,4-diyl diacetate**  
**(3)**

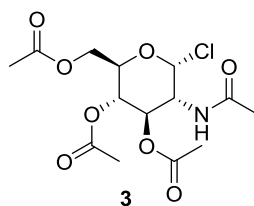

According to the method previously described [3], A solution of **2** (1.00 g, 2.73 mmol) in acetic anhydride (Certified ACS grade, Fisher Chemical Catalog No. A10-500) (10 mL) was cooled to

0 °C and HCl (g) was added until the solution was saturated. The HCl(g) was generated by the slow dropwise addition of concentrated sulfuric acid (Fisher Chemical Catalog No. S25597) to sodium chloride (Reagent grade, Fisher Chemical Catalog No. S25541B) in a separate flask and transferred via tubing and needle to the reaction flask. The reaction mixture was allowed to warm to room temperature and stirred for 2 days. Upon completion of the reaction, the solvent was partially removed *in vacuo*. Water (25 mL) was added, and the solution was extracted with ethyl acetate (2x). The combined organic phases were washed with saturated aqueous NaHCO<sub>3</sub> and brine, dried over anhydrous Na<sub>2</sub>SO<sub>4</sub>, and concentrated *in vacuo*. The crude product was purified by flash chromatography using hexane and ethyl acetate as eluent and obtained as white solid (0.650 g, 65%): <sup>1</sup>H NMR (300 MHz, CDCl<sub>3</sub>) δ 6.19 (d, *J* = 3.7 Hz, 1H), 5.80 (d, *J* = 8.7 Hz, 1H), 5.41 – 5.15 (m, 2H), 4.54 (ddd, *J* = 10.5, 8.8, 3.7 Hz, 1H), 4.35 – 4.22 (m, 2H), 4.19 – 4.08 (m, 1H), 2.11 (s, 3H), 2.06 (s, 3H), 2.06 (s, 3H), 1.99 (s, 3H); <sup>13</sup>C NMR (75 MHz, CDCl<sub>3</sub>) δ 171.40, 170.55, 170.15, 169.12, 93.65, 70.88, 70.10, 66.99, 61.14, 53.44, 23.04, 20.67, 20.54.

**(2*R*,3*S*,4*R*,5*R*,6*R*)-5-Acetamido-2-(acetoxymethyl)-6-azidotetrahydro-2*H*-pyran-3,4-diyl diacetate (4)**

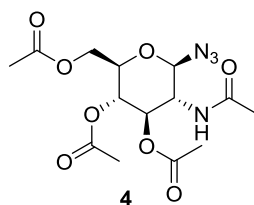

According to the previously described methods [4, 5], to a solution of **3** (1.97 g, 5.39 mmol), tetrabutylammonium hydrogen sulfate (TCI America Catalog No. T0835) (1.83 g, 5.39 mmol) and sodium azide (99%, extra pure, Acros Organics Catalog No. 190381000) (1.75 g, 26.9 mmol) in dichloromethane (19.7 mL) was added saturated aqueous NaHCO<sub>3</sub> (19.7 mL). The mixture was vigorously stirred at room temperature for 2-3 h, and the progress of reaction was monitored by TLC. After completion of the reaction, ethyl acetate (~200 mL) was added. The organic phase was separated, washed with saturated aqueous NaHCO<sub>3</sub>, water, and brine. The organic phase was dried over anhydrous Na<sub>2</sub>SO<sub>4</sub> and concentrated *in vacuo*. The crude product was purified by flash chromatography using hexane and ethyl acetate as eluent, dried, and obtained as white solid (1.78

g, 89%). Spectral data ( $^1\text{H}$  and  $^{13}\text{C}$  NMR) were found in accordance with those previously published [4].

**(2*R*,3*S*,4*R*,5*R*,6*R*)-5-Acetamido-2-(acetoxymethyl)-6-aminotetrahydro-2*H*-pyran-3,4-diyl diacetate (5)**

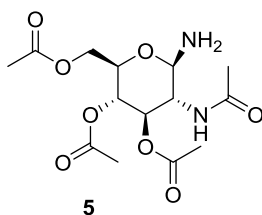

Ammonium formate (Sigma-Aldrich Catalog No. 156264) (139 mg, 2.20 mmol) and 10% palladium on carbon (Type 487, dry, Alfa Aesar Catalog No. A12012) (118 mg) were added to a solution of compound **4** (328 mg, 0.881 mmol) in dry ethanol (8 mL) and sealed in screw cap vial. The mixture was allowed to stir for 2 h at room temperature. After completion of reaction, methanol (5 mL) was added to the reaction mixture, and it was filtered through a syringe filter (0.2  $\mu\text{m}$ ). The filtrate was concentrated *in vacuo* and used directly in the next step without further purification. Spectral data ( $^1\text{H}$  and  $^{13}\text{C}$  NMR) were found in accordance with those previously published [4].

**(2*R*,3*S*,4*R*,5*R*,6*R*)-6-(((*S*)-3-(((9*H*-Fluoren-9-yl)methoxy)carbonyl)amino)-4-(tert-butoxy)-4-oxobutanamido)-5-acetamido-2-(acetoxymethyl)tetrahydro-2*H*-pyran-3,4-diyl diacetate (7)**

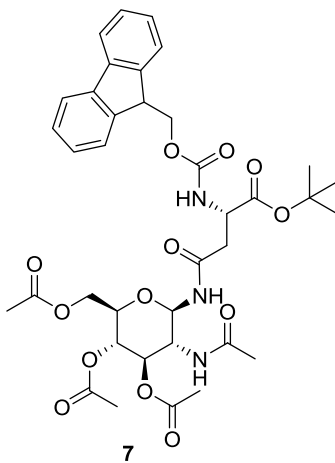

*N,N'*-Diisopropylethylamine (DIEA) (Chem-Impex Catalog No. 00141) (0.295 mL, 1.69 mmol) was added to a mixture of amino acid **6** (351 mg, 0.853 mmol) and O-(7-Aza-1H-benzotriazol-1-yl)-*N,N,N',N'*-tetramethyluronium hexafluorophosphate (HATU) (Matrix Scientific Catalog No. 067222) (643 mg, 1.69 mmol) in dichloromethane (5 mL) under a N<sub>2</sub> atmosphere, and the reaction mixture was allowed to stir at room temperature. After 15 min, a solution of compound **5** (291 mg, 0.840 mmol) in dichloromethane (4 mL) was added, and the reaction mixture was stirred for an additional 12 h at room temperature. The progress of the reaction was monitored by TLC and LCMS. After completion of the reaction, water (10 mL) was added, and the mixture was extracted with dichloromethane (2x). The combined organic layers were dried over anhydrous Na<sub>2</sub>SO<sub>4</sub> and concentrated *in vacuo*. The crude product was purified by flash chromatography using dichloromethane and methanol as eluent and obtained as a yellow solid (850 mg, 68%). Spectral data (<sup>1</sup>H and <sup>13</sup>C NMR) were found in accordance with those previously published [4].

***N*<sup>2</sup>-(((9*H*-fluoren-9-yl)methoxy)carbonyl)-*N*<sup>4</sup>-((2*R*,3*R*,4*R*,5*S*,6*R*)-3-acetamido-4,5-diacetoxy-6-(acetoxymethyl)tetrahydro-2*H*-pyran-2-yl)-*L*-asparagine (**8**)**

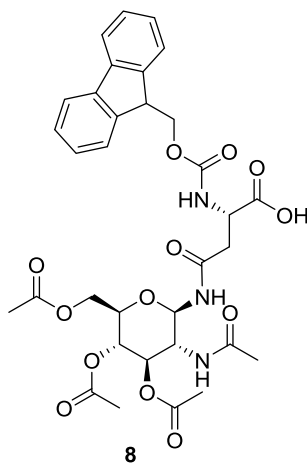

Compound **7** (1.05 g, 1.42 mmol) was dissolved in dichloromethane (500  $\mu$ L) with stirring and cooled in an ice bath. 95% Trifluoroacetic acid (Alfa Aesar Catalog No. A12198) in dichloromethane (5 mL) was added, and the reaction mixture was stirred at room temperature for 2h. The progress of the reaction was monitored by TLC and LCMS. After completion of the reaction, solvent was removed *in vacuo*, and the crude product was purified by reverse phase chromatography using acetonitrile and water as eluent. The product was obtained as a white

solid (835 mg, 86%). Spectral data ( $^1\text{H}$  and  $^{13}\text{C}$  NMR) were found in accordance with those previously published [4].

**(2*R*,3*S*,4*R*,5*R*,6*R*)-6-((*S*)-3-(((9*H*-Fluoren-9-yl)methoxy)carbonyl)amino)-4-oxo-4-(propylamino)butanamido)-5-acetamido-2-(acetoxymethyl)tetrahydro-2*H*-pyran-3,4-diyl diacetate (9)**

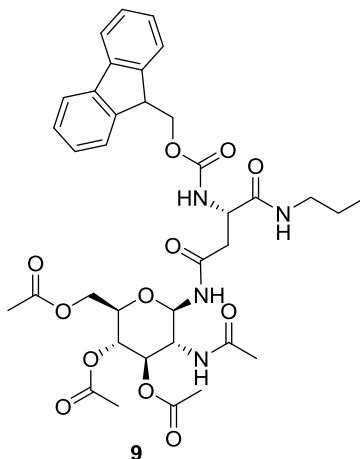

DIEA (Chem-Impex Catalog No. 00141) (141  $\mu\text{L}$ , 0.878 mmol) was added to a mixture of compound **8** (300 mg, 0.439 mmol) and HATU (Matrix Scientific Catalog No. 067222) (335 mg, 0.878 mmol) in dichloromethane (10 mL) under a nitrogen atmosphere. The reaction mixture was allowed to stir at room temperature. After 15 mins, *n*-propylamine (Alfa Aesar Catalog No. 36635) (181  $\mu\text{L}$ , 2.20 mmol) in dichloromethane (1 mL) was added. Stirring continued for 12-15h at room temperature. The progress of the reaction was monitored by TLC and LCMS. After completion of the reaction, solvent was removed *in vacuo*, and the crude product was used in the next step without any further purification.

**(2*R*,3*S*,4*R*,5*R*,6*R*)-5-Acetamido-2-(acetoxymethyl)-6-((*S*)-3-amino-4-oxo-4-(propylamino)butanamido)tetrahydro-2*H*-pyran-3,4-diyl diacetate (10)**

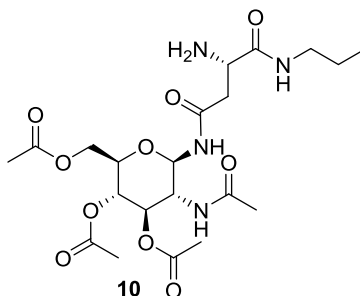

Compound **9** (300 mg, 0.413 mmol) was dissolved in 20% piperidine (Sigma-Aldrich Catalog No. 104094) solution in DMF (4 mL), and the solution was stirred for one hour at room temperature. After completion of the reaction as judged by LCMS, the solvent was removed *in vacuo*, and the crude product was purified by reverse phase chromatography using acetonitrile and water as eluent to afford the product as a white solid (175 mg, 84%): <sup>1</sup>H NMR (300 MHz, DMSO-d<sub>6</sub>) δ 8.71 (d, *J* = 9.5 Hz, 1H), 8.00 – 7.79 (m, 2H), 5.12 (dd, *J* = 18.5, 9.0 Hz, 2H), 4.82 (t, *J* = 9.7, 1H), 4.26 – 4.11 (m, 1H), 4.02 – 3.76 (m, 3H), 3.51 – 3.37 (m, 1H), 3.34 – 3.22 (m, 1H), 3.01 (q, *J* = 7.0 Hz, 3H), 2.00 (s, 3H), 1.97 (s, 3H), 1.91 (s, 3H), 1.74 (s, 3H), 1.40 (q, *J* = 7.2 Hz, 2H), 0.83 (t, *J* = 7.4 Hz, 3H).

## FINAL ANALOGS

**(2R,3S,4R,5R,6R)-5-acetamido-2-(acetoxymethyl)-6-((S)-3-acrylamido-4-oxo-4-(propylamino)butanamido)tetrahydro-2H-pyran-3,4-diyl diacetate (NM-322)**

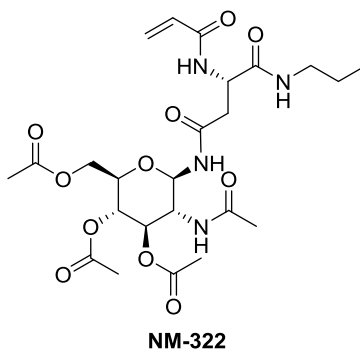

A solution of acryloyl chloride (Alfa Aesar Catalog No. L10363) (9.68 μL, 0.119 mmol) in DCM (500 μL) was added dropwise via syringe to a mixture of compound **10** (50 mg, 0.099 mmol) and triethylamine (Acros Organics Catalog No. 157911000) (30 μL, 0.22 mmol) in dichloromethane (3 mL) in an ice bath. The mixture was allowed to warm to room temperature and stirred for an additional 3-4h. After completion of the reaction, the solvent was removed *in vacuo*, and the crude

compound was purified by preparative HPLC using acetonitrile and water as eluent to afford the product as a white solid (21 mg, 38%):  $^1\text{H}$  NMR (300 MHz, DMSO- $d_6$ )  $\delta$  8.51 (d,  $J = 9.5$  Hz, 1H), 8.25 (d,  $J = 8.2$  Hz, 1H), 7.88 (d,  $J = 9.1$  Hz, 1H), 7.79 (t,  $J = 5.7$  Hz, 1H), 6.27 (dd,  $J = 17.1, 10.1$  Hz, 1H), 6.07 (dd,  $J = 17.1, 2.3$  Hz, 1H), 5.58 (dd,  $J = 10.0, 2.3$  Hz, 1H), 5.13 (dt,  $J = 19.9, 9.7$  Hz, 2H), 4.81 (t,  $J = 9.7$  Hz, 1H), 4.63 (q,  $J = 7.5$  Hz, 1H), 4.17 (dd,  $J = 12.4, 4.2$  Hz, 1H), 3.99 – 3.75 (m, 3H), 2.99 (q,  $J = 6.3$  Hz, 2H), 2.59 (dd,  $J = 15.9, 6.2$  Hz, 1H), 2.39 (dd,  $J = 16.0, 7.4$  Hz, 1H), 1.99 (s, 3), 1.96 (s, 3H), 1.90 (s, 3H), 1.73 (s, 3H), 1.42 – 1.34 (m, 2H), 0.80 (t,  $J = 7.4$ , 3H);  $^{13}\text{C}$  NMR (75 MHz, DMSO- $d_6$ )  $\delta$  170.90, 170.51, 170.29, 169.97, 169.94, 169.79, 164.72, 132.08, 125.86, 78.37, 73.81, 72.67, 68.79, 62.28, 52.61, 50.63, 49.77, 37.89, 23.11, 22.68, 21.00, 20.88, 20.84, 11.74; HRMS, calc'd for  $\text{C}_{24}\text{H}_{37}\text{N}_4\text{O}_{11}^+$  [M+H], 557.2453; found 557.2454.

**(2R,3S,4R,5R,6R)-5-Acetamido-2-(acetoxymethyl)-6-((S)-3-(2-chloroacetamido)-4-oxo-4-(propylamino)butanamido)tetrahydro-2H-pyran-3,4-diyl diacetate (NM-350).**

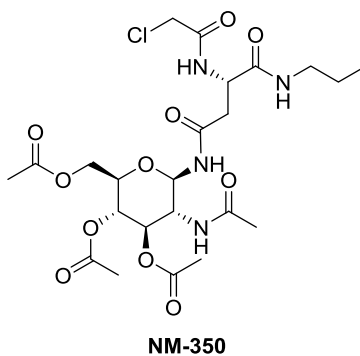

A solution of chloroacetyl chloride (Alfa Aesar Catalog No. A15846) (10.8 mg, 0.095 mmol) in DCM (500  $\mu\text{L}$ ) was added dropwise via syringe to a mixture of compound **10** (40 mg, 0.079 mmol) and triethylamine (Acros Organics Catalog No. 157911000) (25  $\mu\text{L}$ , 0.18 mmol) in dichloromethane (3 mL) in an ice bath. The mixture was allowed to warm to room temperature and stirred for an additional 3-4h. After completion of the reaction, the solvent was removed *in vacuo*, and the crude compound was purified by preparative HPLC using acetonitrile and water as eluent to afford the product as a white solid (25 mg, 54%):  $^1\text{H}$  NMR (300 MHz, DMSO- $d_6$ )  $\delta$  8.53 (d,  $J = 9.4$  Hz, 1H), 8.34 (d,  $J = 8.3$  Hz, 1H), 7.88 (d,  $J = 9.3$  Hz, 1H), 7.82 (t,  $J = 5.9$  Hz, 1H), 5.13 (dt,  $J = 19.8, 9.7$  Hz, 2H), 4.81 (t,  $J = 9.8$  Hz, 1H), 4.54 (q,  $J = 7.0$  Hz, 1H), 4.20 – 4.11 (m, 1H), 4.09 (s, 2H), 4.03 – 3.77 (m, 3H), 2.99 (q,  $J = 6.1$  Hz, 2H), 2.57 (dd,  $J = 15.9, 5.9$



Hz, 1H), 2.48 – 2.39 (m, 1H), 1.99 (s, 3H), 1.96 (s, 3H), 1.90 (s, 3H), 1.74 (s, 3H), 1.38 (h,  $J = 7.2$  Hz, 2H), 0.81 (t,  $J = 7.4$  Hz, 3H);  $^{13}\text{C}$  NMR (75 MHz, DMSO- $d_6$ )  $\delta$  170.49, 170.40, 170.38, 170.33, 169.97, 169.77, 166.00, 78.39, 73.85, 72.71, 68.82, 62.30, 52.57, 50.08, 43.11, 37.74, 23.08, 22.76, 22.68, 20.99, 20.87, 20.84, 11.74; HRMS, calc'd for  $\text{C}_{23}\text{H}_{36}\text{ClN}_4\text{O}_{11}^+$  [M+H], 579.2064; found 579.2067.

**(2R,3S,4R,5R,6R)-5-Acetamido-2-(acetoxymethyl)-6-((S)-4-oxo-4-(propylamino)-3-(vinylsulfonamido)butanamido)tetrahydro-2H-pyran-3,4-diyl diacetate (NM-348)**

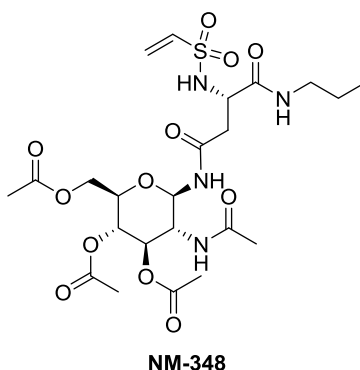

A solution of 2-Chloroethanesulfonyl chloride (TCI America Catalog No. C1142) (14.5 mg, 0.089 mmol) in DCM (500  $\mu\text{L}$ ) was added dropwise via syringe to a mixture of compound **10** (45 mg, 0.089 mmol) and triethylamine (Acros Organics Catalog No. 157911000) (25  $\mu\text{L}$ , 0.18 mmol) in dichloromethane (3 mL) in an ice bath. The mixture was allowed to warm to room temperature and stirred for an additional 3-4h. After completion of the reaction, the solvent was removed *in vacuo*, and the crude compound was purified by preparative HPLC using acetonitrile and water as eluent to afford the product as a white solid (27 mg, 50%):  $^1\text{H}$  NMR (300 MHz, DMSO- $d_6$ )  $\delta$  8.64 – 8.44 (m, 1H), 7.90 (d,  $J = 9.06$  Hz, 1H), 7.83 (t,  $J = 5.80$ , 2H), 7.57 (s, 1H), 6.63 (dd,  $J = 16.5, 9.9$  Hz, 1H), 6.10 – 5.77 (m, 2H), 5.26 – 5.03 (m, 2H), 4.82 (t,  $J = 9.8$ , 1H), 4.18 (dd,  $J = 12.3, 4.1$  Hz, 1H), 4.10 – 3.72 (m, 4H), 2.99 (q,  $J = 6.5$  Hz, 2H), 2.56 (d,  $J = 6.0$  Hz, 1H), 2.46 – 2.31 (m, 1H), 2.00 (s, 3H), 1.97 (s, 3H), 1.91 (s, 3H), 1.76 (s, 3H), 1.41 (dt,  $J = 14.3, 7.4$  Hz, 2H), 0.82 (t,  $J = 7.3$  Hz, 2H);  $^{13}\text{C}$  NMR (75 MHz, DMSO- $d_6$ )  $\delta$  170.50, 170.13, 170.08, 170.02, 170.00, 169.77, 137.86, 125.71, 78.43, 73.77, 72.69, 68.84, 62.31, 53.30, 52.60, 52.04, 39.03, 23.12, 22.63, 20.99, 20.88, 20.84, 11.75; HRMS, calc'd for  $\text{C}_{23}\text{H}_{37}\text{N}_4\text{O}_{12}\text{S}^+$  [M+H], 593.2123; found 593.2135.

**(2R,3S,4R,5R,6R)-5-Acetamido-2-(acetoxymethyl)-6-((S)-3-((E)-4-(dimethylamino)but-2-enamido)-4-oxo-4-(propylamino)butanamido)tetrahydro-2H-pyran-3,4-diyl diacetate (NM-354)**

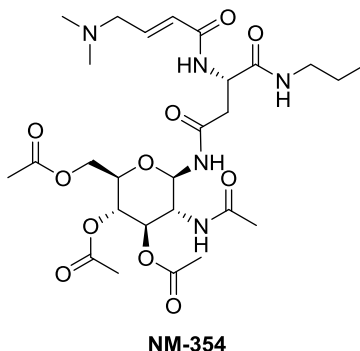

DIEA (Chem-Impex Catalog No. 00141) (31  $\mu$ L, 0.191 mmol) was added to the mixture of Compound **10** (48 mg, 0.0956 mmol) and HATU (Matrix Scientific Catalog No. 067222) (48 mg, 0.124 mmol) in dichloromethane (3 mL) under a nitrogen atmosphere and stirred for 15 min. A solution of 4-(dimethylamino)but-2-enoic acid hydrochloride (Ark Pharm Catalog No. AK-44120) (16 mg, 0.0965 mmol) in dichloromethane (2 mL) was added to the mixture, and it was stirred for an additional 10h. After completion of the reaction, the solvent was removed *in vacuo*, and the crude product was purified by preparative HPLC using acetonitrile and water as eluent to afford the product (17.2 mg, 30%):  $^1\text{H}$  NMR (300 MHz,  $\text{CD}_3\text{OD}$ )  $\delta$  8.61 (d,  $J = 9.1$  Hz, 1H), 8.44 (d,  $J = 8.0$  Hz, 1H), 8.15 (d,  $J = 9.2$  Hz, 1H), 7.95 (t,  $J = 5.6$  Hz, 1H), 6.71 (dt,  $J = 14.7, 7.3$  Hz, 1H), 6.40 (d,  $J = 15.3$  Hz, 1H), 5.29 – 5.11 (m, 2H), 5.05 – 4.92 (m, 2H), 4.24 (dd,  $J = 12.4, 4.4$  Hz, 1H), 4.12 – 3.85 (m, 4H), 3.85 – 3.79 (m, 1H), 3.20 – 3.04 (m, 2H), 2.90 (s, 6H), 2.81 – 2.56 (m, 2H), 2.02 (s, 3H), 2.00 (s, 3H), 1.98 (s, 3H), 1.87 (s, 3H), 1.51 (h,  $J = 7.2$  Hz, 2H), 0.90 (t,  $J = 7.4$  Hz, 3H);  $^{13}\text{C}$  NMR (75 MHz,  $\text{CD}_3\text{OD}$ )  $\delta$  172.33, 171.10, 171.08, 170.86, 170.37, 169.90, 164.45, 132.06, 130.24, 78.22, 73.31, 73.26, 68.50, 61.88, 57.40, 52.76, 50.09, 41.84, 40.97, 37.16, 22.12, 21.34, 19.20, 19.17, 19.13, 10.26; HRMS, calc'd for  $\text{C}_{27}\text{H}_{44}\text{N}_5\text{O}_{11}^+$  [M+H], 614.3032; found 614.3037.

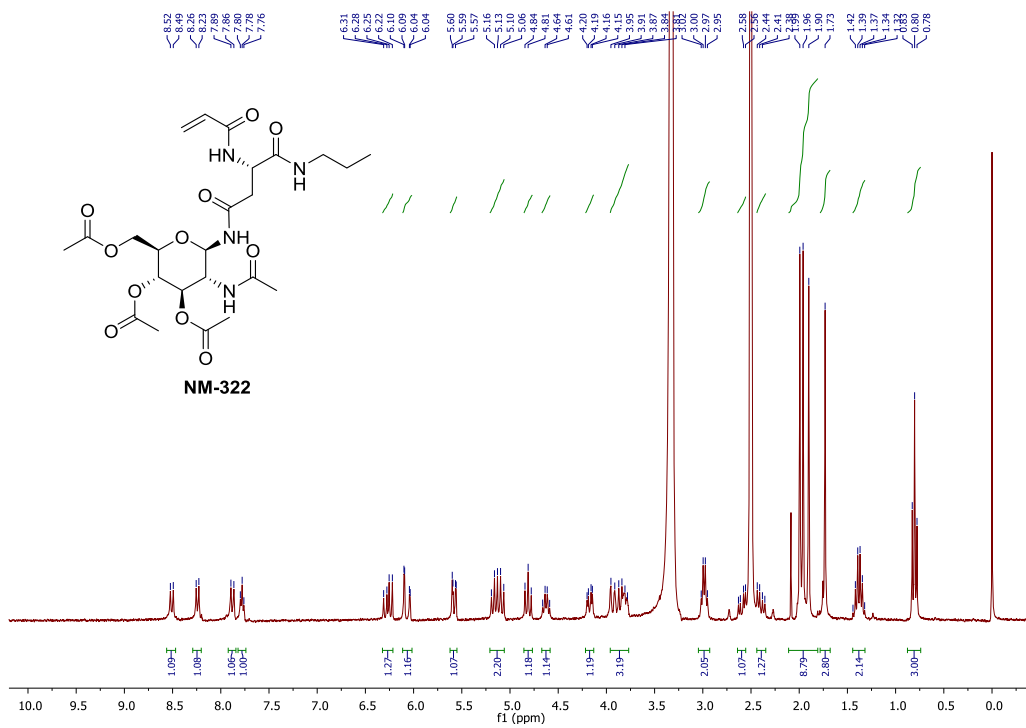

<sup>1</sup>H NMR spectrum of compound NM-322 (300 MHz, DMSO-d<sub>6</sub>)

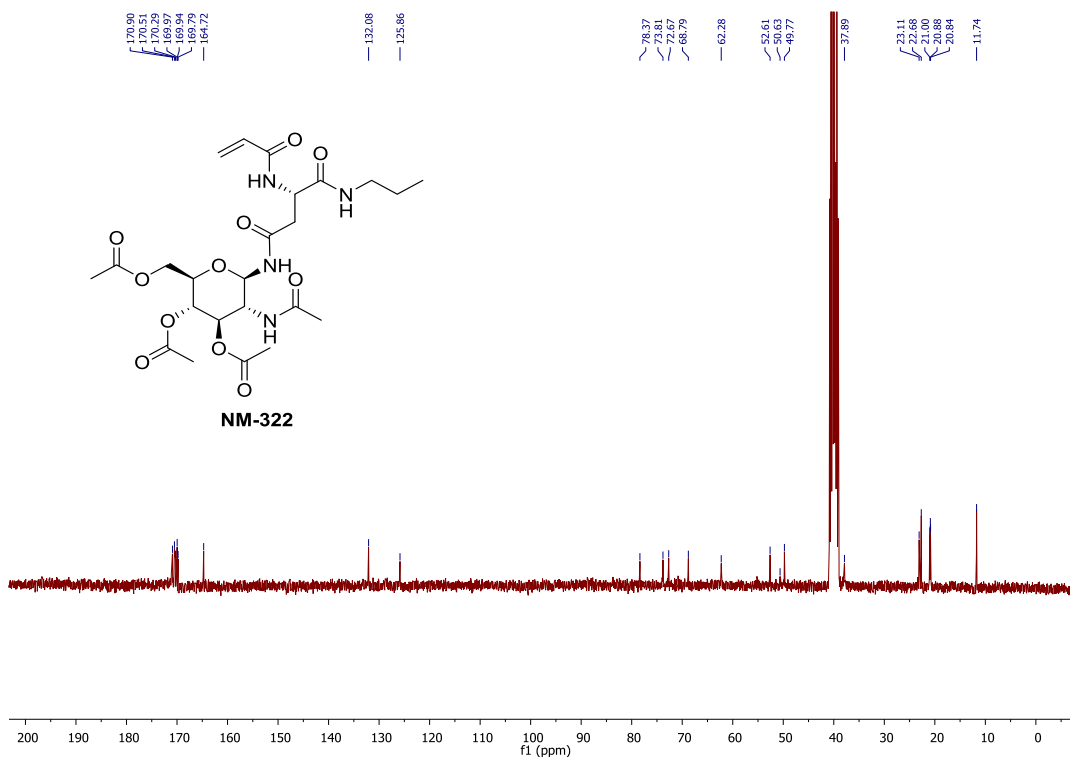

<sup>13</sup>C NMR spectrum of compound NM-322 (75 MHz, DMSO-d<sub>6</sub>)

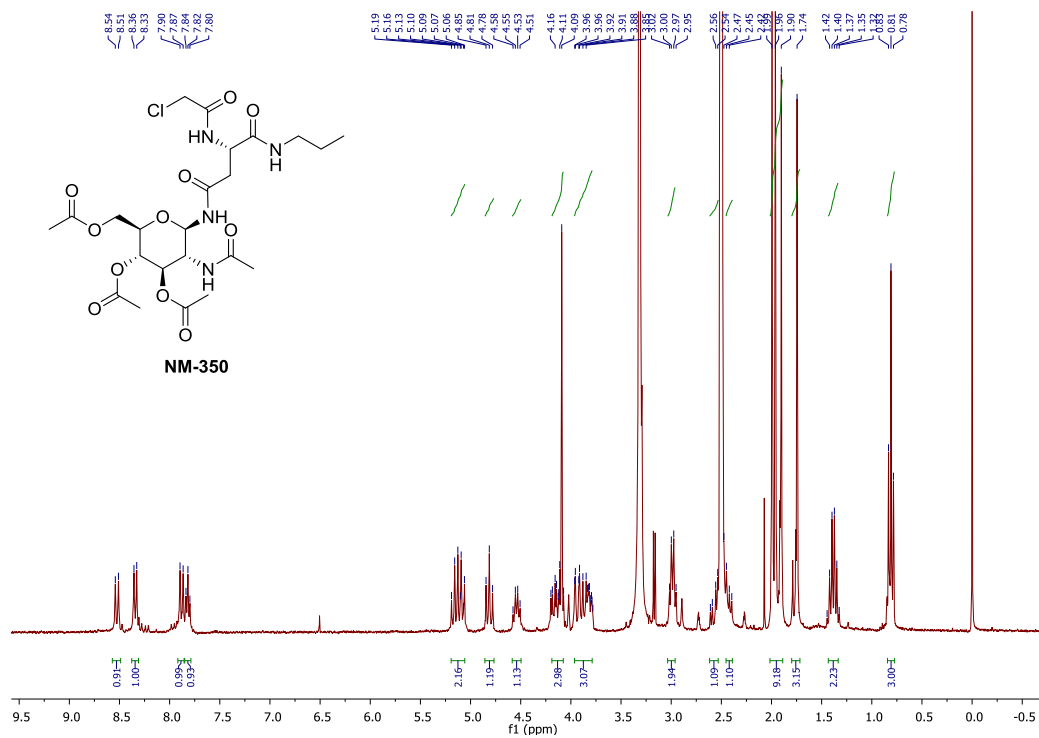

<sup>1</sup>H NMR spectrum of compound **NM-350** (300 MHz, DMSO-d<sub>6</sub>)

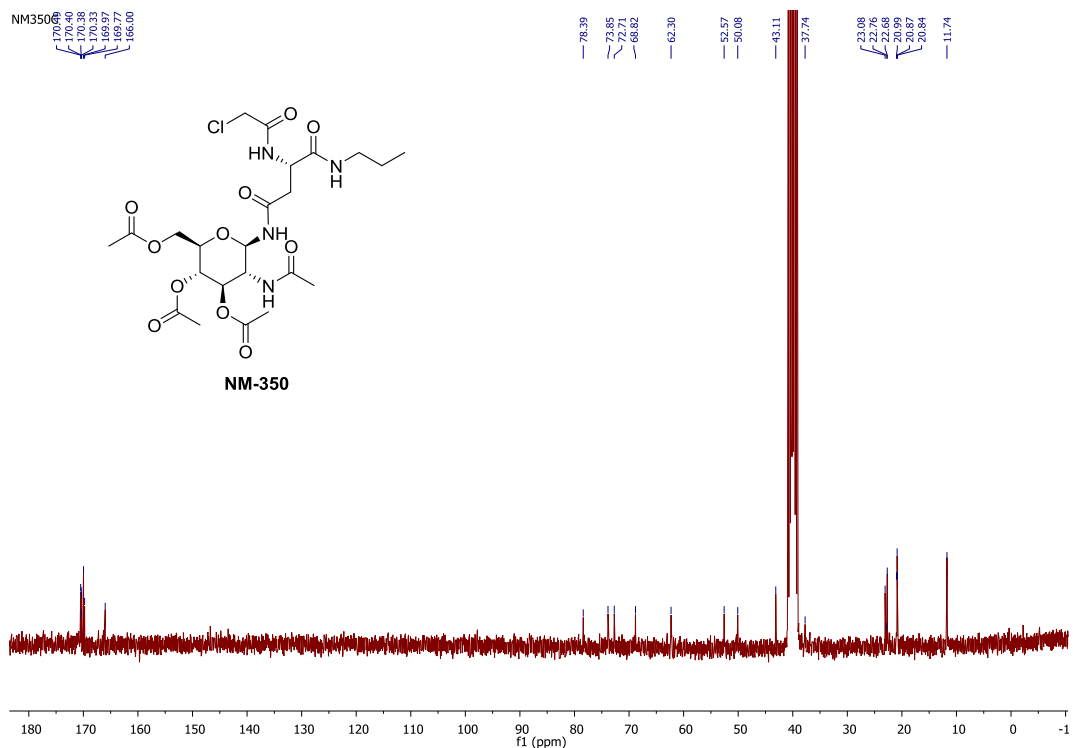

<sup>13</sup>C NMR spectrum of compound **NM-350** (75 MHz, DMSO-d<sub>6</sub>)

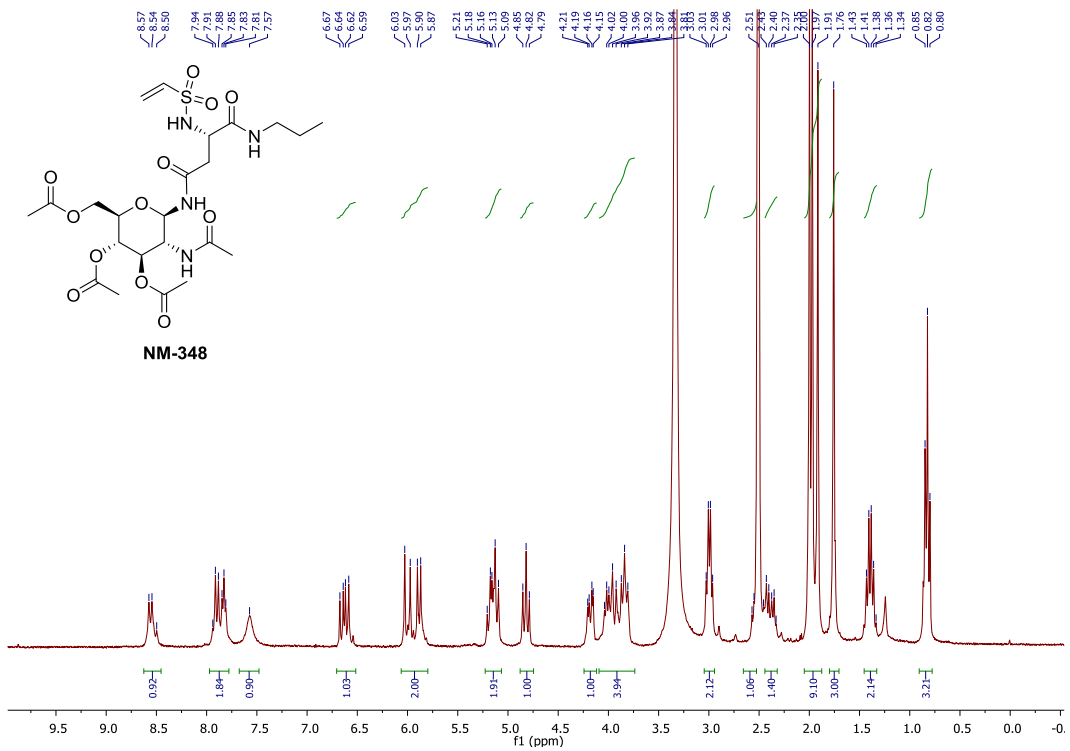

<sup>1</sup>H NMR spectrum of compound NM-348 (300 MHz, DMSO-d<sub>6</sub>)

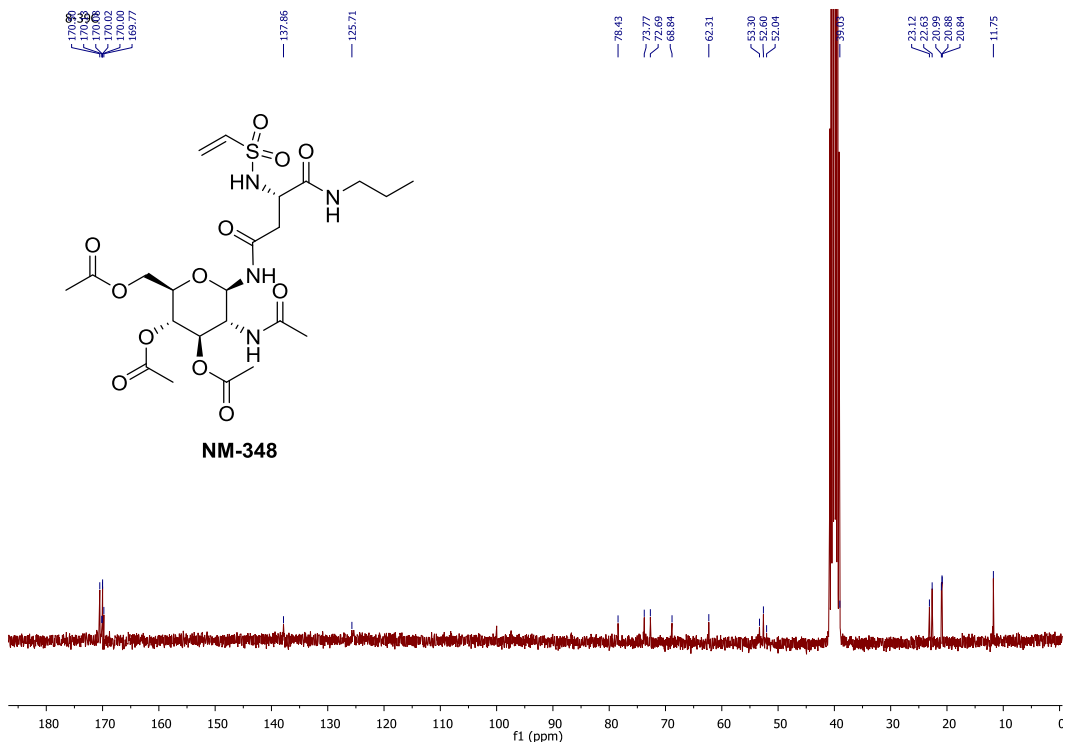

<sup>13</sup>C NMR spectrum of compound NM-348 (75 MHz, DMSO-d<sub>6</sub>)

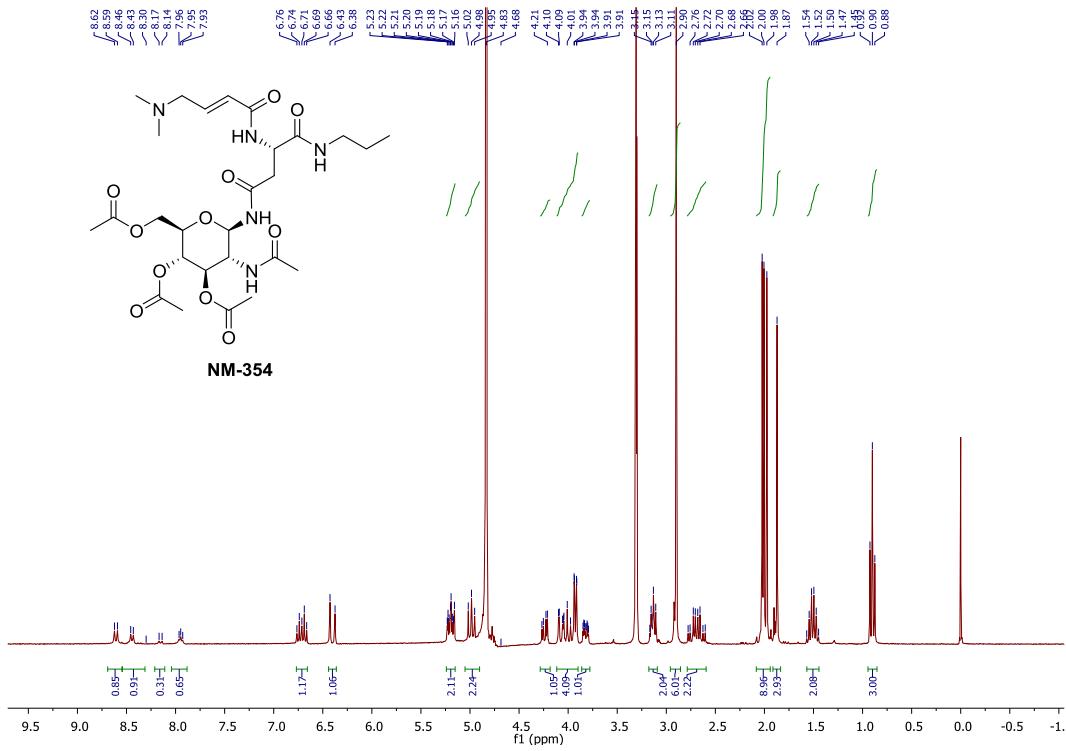

<sup>1</sup>H NMR spectrum of compound NM-354 (300 MHz, DMSO-d<sub>6</sub>)

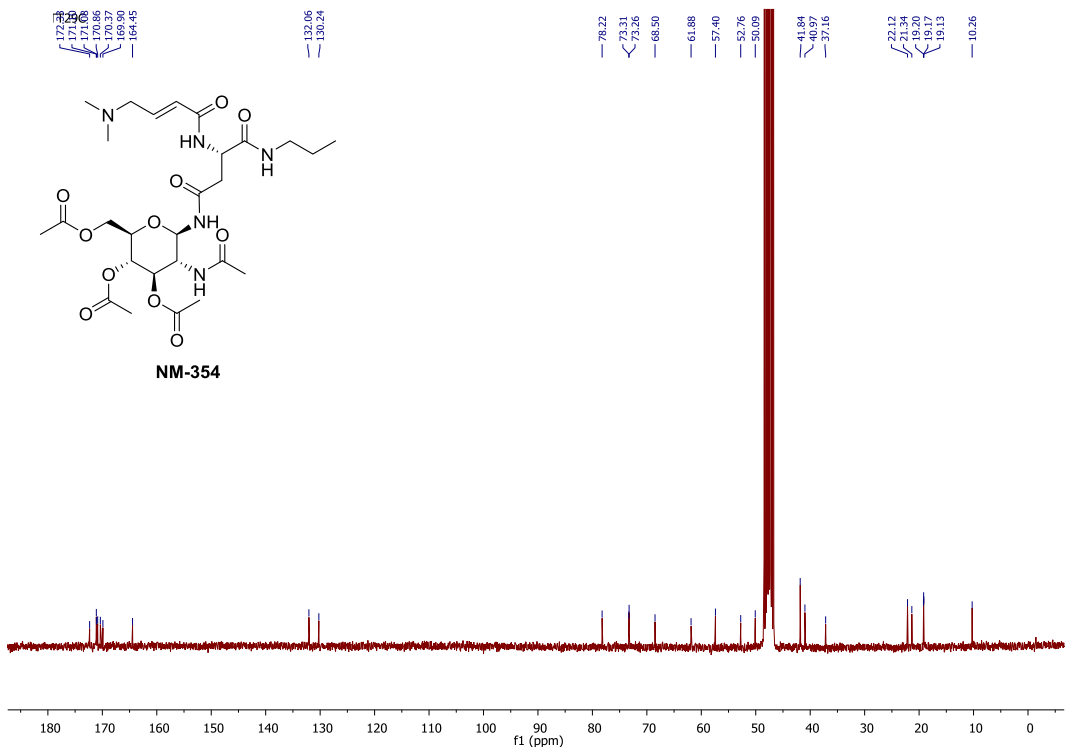

<sup>13</sup>C NMR spectrum of compound NM-354 (75 MHz, DMSO-d<sub>6</sub>)

### *Computational Modeling*

We used the SWISS-MODEL [6] and the crystallographic structure of the mouse NGLY1 (PDB code: 2F4M) as a template to build the structural homology model of human NGLY1 core domain. After the human homology model was obtained, Autodock tools [7] were used to prepare the receptor based on the homology model for compound docking. Each ligand (a compound) was also prepared using the Autodock tools with all single bonds of each ligand left rotatable and all amide bonds fixed in a trans position. The docking process was performed using Autodock Vina [8] with 30 as exhaustiveness to enable the generation of 20 binding poses for each ligand. The binding poses with distances of less than 6 Å between the sulfur of Cys309 of the human NGLY1 and the distal carbon involved in the double bond of the electrophilic replacement (R) group for each tested ligand were ranked based on their docking energies. For Z-VAD-fmk and NM-350, distances between the sulfur of Cys309 and the leaving groups (F and Cl) of two ligands for each binding pose were measured to select candidate poses for ranking. The selected poses with the lowest binding energies in ranking were considered the most favorable binding poses.

**A**

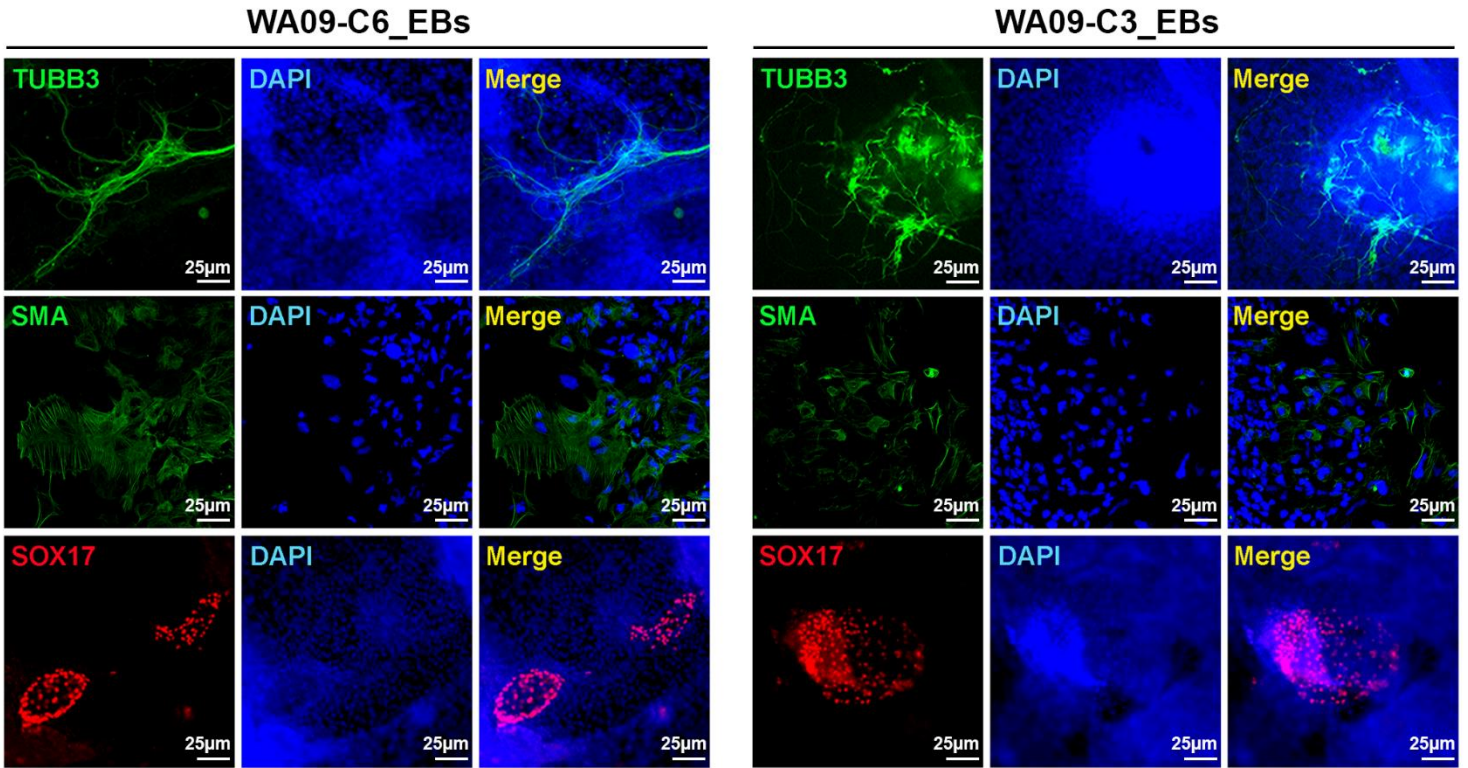

**B**

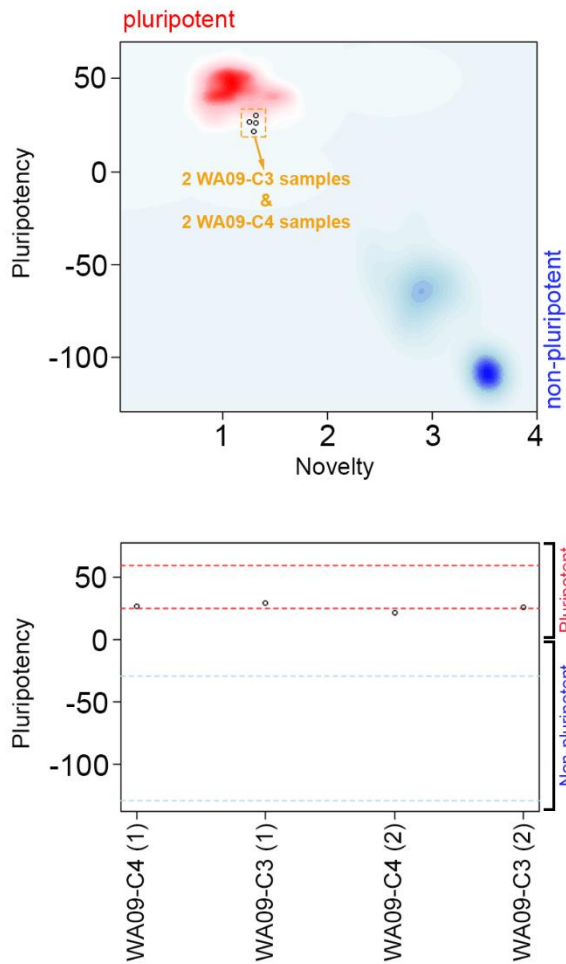

**C**

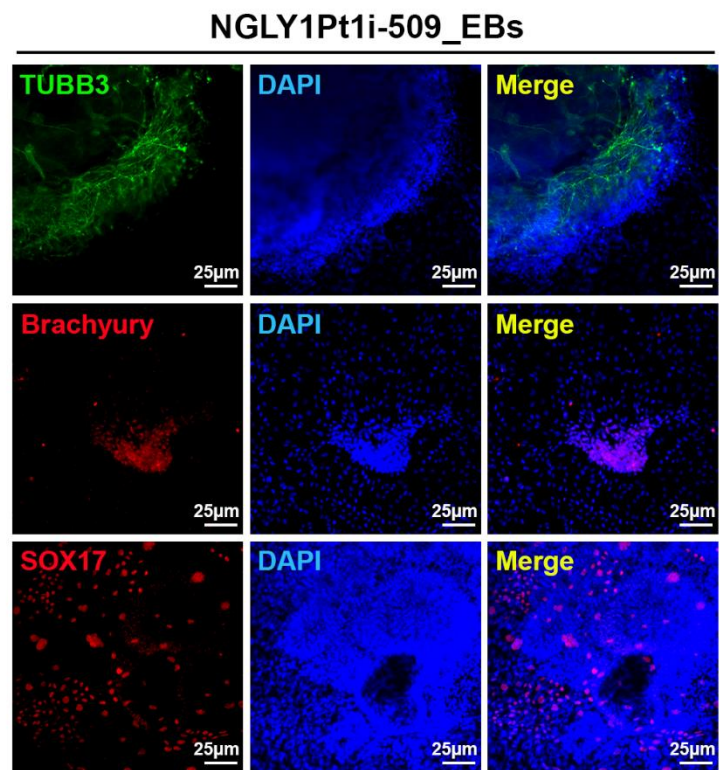

**D**

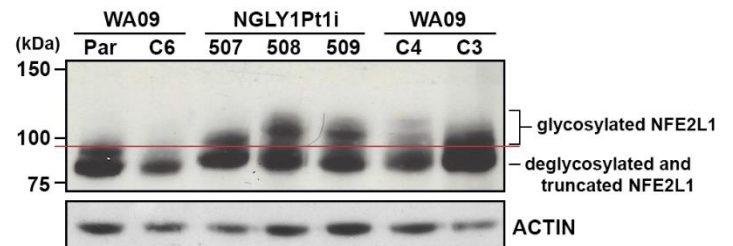



**Supplementary Figure S1.** Cellular pluripotency tests and NFE2L1 expression in hPSCs without NGLY1 expression. **(A)** WA09-C6 (control) and WA09-C3 (NGLY1-KO) hESCs formed EBs containing differentiated cells that are associated with three germ-layer lineages (TUBB3: ectoderm marker, SMA: mesoderm marker, and SOX17: endoderm marker). *Left panel:* WA09-C6 EBs. *Right panel:* WA09-C3 EBs. **(B)** The Pluritest results of undifferentiated WA09-C3 and WA09-C4 hESCs that are two independent NGLY1-knockout subclones revealed that their transcriptomic features are highly similar to the transcriptomic features of hPSC samples included in the Pluritest database. **(C)** NGLY1-deficient patient-derived hiPSCs formed EBs containing differentiated cells that are associated with three germ-layer lineages (TUBB3: ectoderm marker, Brachyury: mesoderm marker, and SOX17: endoderm marker). **(D)** The electrophoretic mobility shift of NFE2L1 (migrating towards the location of 100 kDa or above) indicating its retention of *N*-glycans was detected in NGLY1-knockout WA09 hESCs (WA09-C3, WA09-C4 cells) and NGLY1 deficient patient-derived iPSCs (NGLY1Pt1i-507, NGLY1Pt1i-508 and NGLY1Pt1i-509 cells) treated with 20  $\mu$ M bortezomib for 4 hours. *Par:* parental WA09 hESCs. *C6:* WA09-C6 cells.

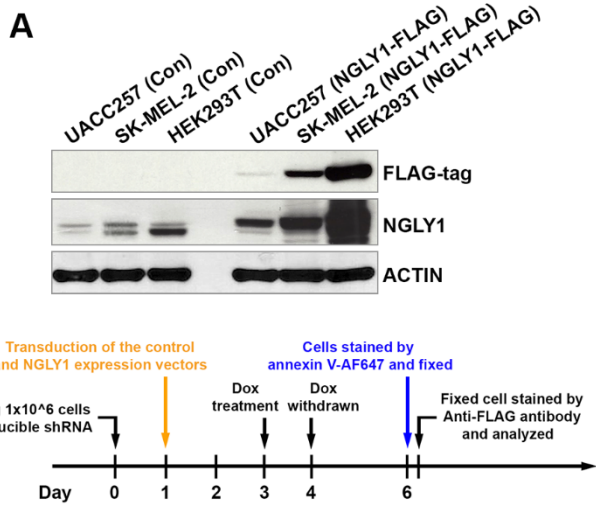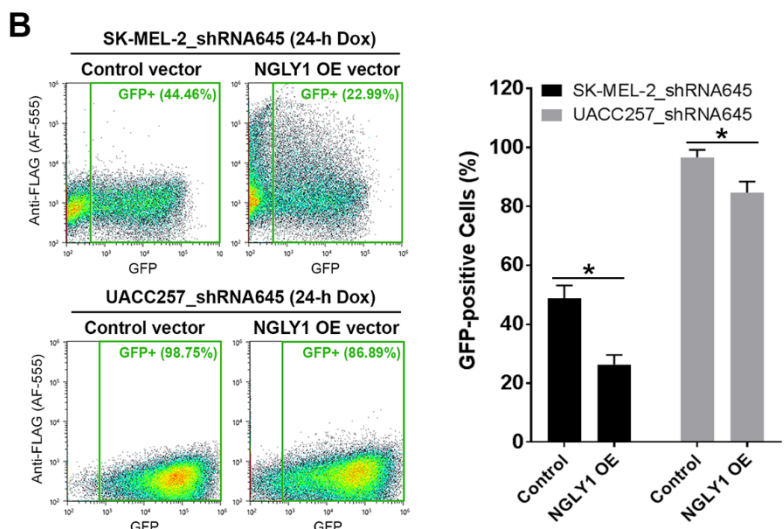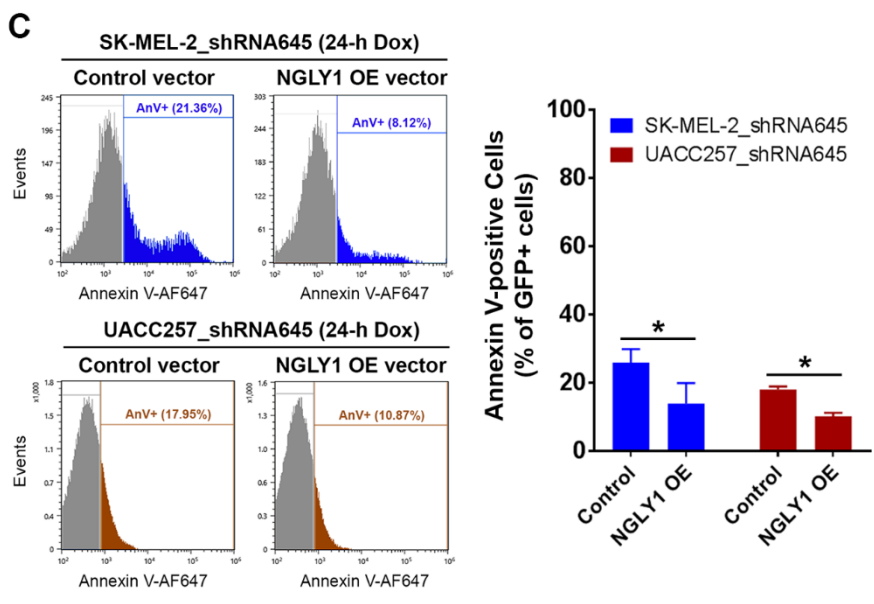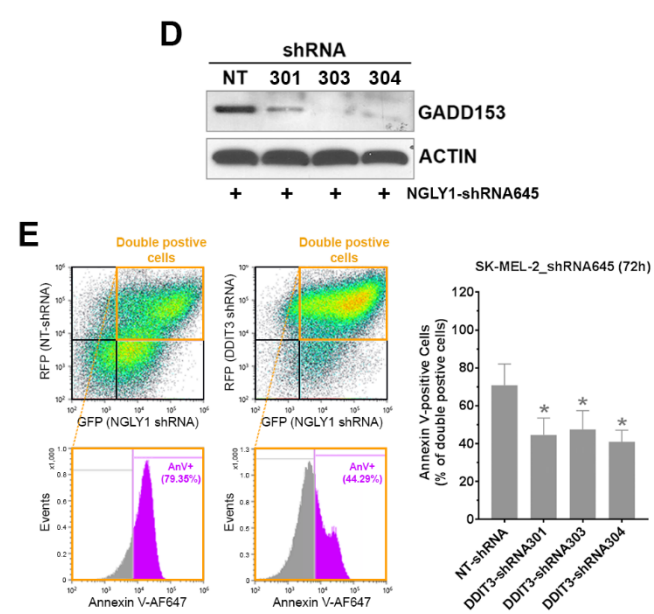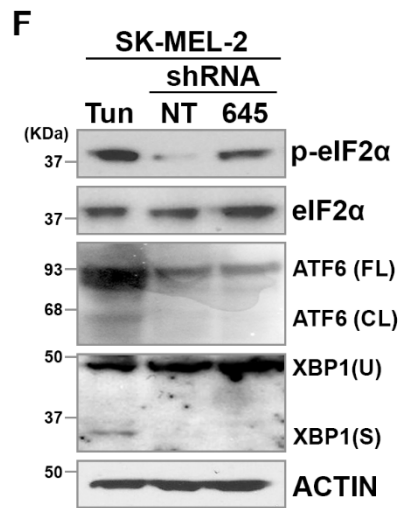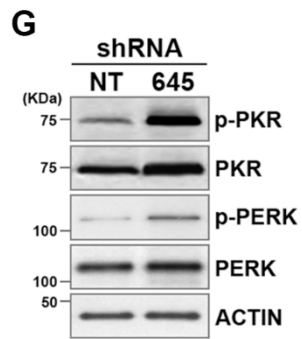

**Supplementary Figure S2.** The attenuation of NGLY1 knockdown-induced apoptosis by NGLY1 overexpression and GADD153 knockdown in melanoma cells. **(A)** *Upper panel:* The overexpression of FLAG-tagged human NGLY1 in melanoma and HEK293T cells. *Lower panel:* The schematic illustration of testing the rescue effect of NGLY1 overexpression in melanoma cells with induced NGLY1 knockdown. **(B)** The overexpression of human NGLY1 attenuated the induced expression of ZsGreen (GFP) in melanoma cells, indicating that the expanded pool of NGLY1 transcripts effectively interfered with the induced ZsGreen-shRNA transcripts. *Left panel:* Dot plot representation of flow cytometry analysis in the cells. *Right panel:* The percentages of GFP-positive cells in the dox-induced melanoma cells that received the control and NGLY1 overexpression (NGLY1 OE) vectors. **(C)** The analysis of apoptotic (annexin V-stained) cells in the GFP-positive populations of the dox-induced melanoma cells that received the control and NGLY1 OE vectors. **(D)** The shRNA-mediated suppression of NGLY1 knockdown-induced GADD153 (DDIT3) in SK-MEL-2 cells. SK-MEL-2 cells with inducible NGLY1-shRNA645 were transduced with GADD153-targeting shRNA and subsequently treated with 2 $\mu$ M dox for 48 hours to induce the expression of NGLY1-targeting shRNA. Three independent shRNA sequences that target GADD153: shRNA301, shRNA303 and shRNA304. **(E)** The shRNA-mediated suppression of GADD153 attenuated NGLY1 knockdown-induced apoptosis in SK-MEL-2 cells. *Upper left panel:* The GFP/RFP-double positive cells indicated NGLY1-knockdown/control and NGLY1-knockdown/GADD153-knockdown cells. *Lower left panel:* The analysis of apoptotic (annexin V-stained) cells in the GFP/RFP-double positive cells. *Right panel:* The quantitative results of flow cytometry analysis in the cells with 72-hour induction of NGLY1-targeting shRNA. **(F)** The expression and activation of ER stress signaling-associated molecules detected by western blotting in SK-MEL-2 melanoma cells with indicated treatment. *Tun:* 2 $\mu$ M tunicamycin for 24 hours. *FL:* full-length. *CL:* cleavaged. *U:* unspliced. *S:* spliced. **(G)** The expression and activation of two eIF2 $\alpha$  kinases, PKR (EIF2AK2) and PERK (EIF2AK3), detected by western blotting in SK-MEL-2 melanoma cells with indicated treatment. The All the quantitative data were presented as mean  $\pm$  standard deviation ( $n=3$ ) in the bar graphs (\* $P<0.05$ ,  $t$ -test).

MALME3M\_NT-shRNA (48h)

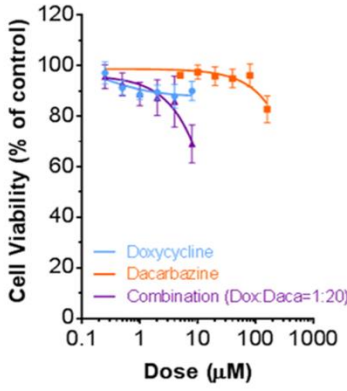

MALME3M\_shRNA645 (48h)

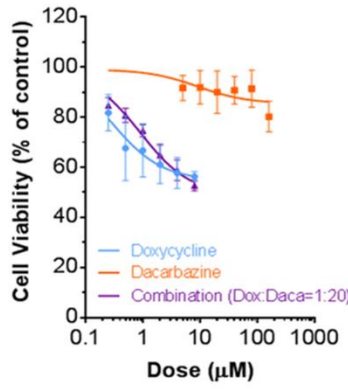

MALME3M\_shRNA647 (48h)

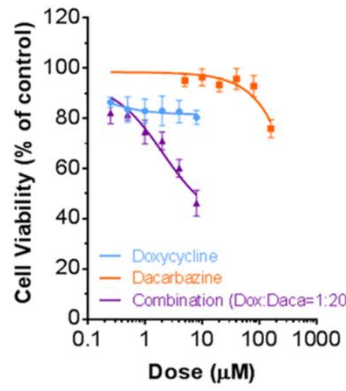

MALME3M (48h)

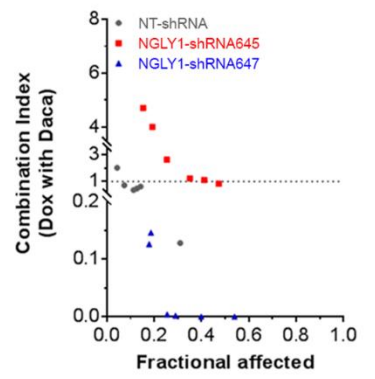

SK-MEL-2\_NT-shRNA (48h)

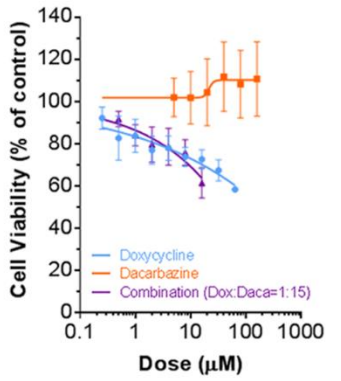

SK-MEL-2\_shRNA645 (48h)

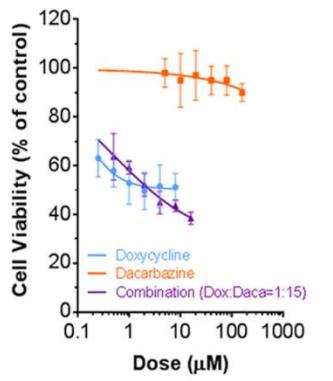

SK-MEL-2\_shRNA647 (48h)

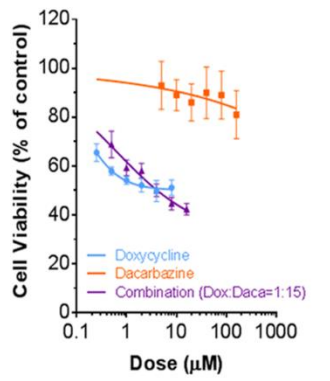

SK-MEL-2 (48h)

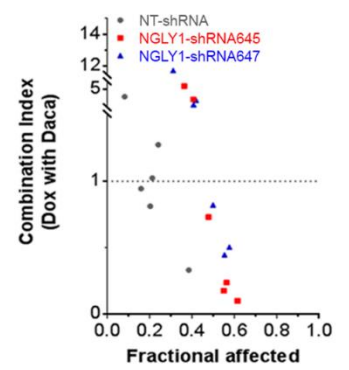

**Supplementary Figure S3.** The anticancer responses of the concomitant treatment of NGLY1 knockdown and dacarbazine for 48 hours in MALME3M and SK-MEL-2 melanoma cells. The calculation of combination indexes was performed using CalcuSyn software. A combination index value  $<1$  was considered synergistic. A combination index value  $<0.2$  was considered highly synergistic. All cell viability data were presented as mean  $\pm$  standard deviation ( $n=3$ ).

## Without doxycycline treatment

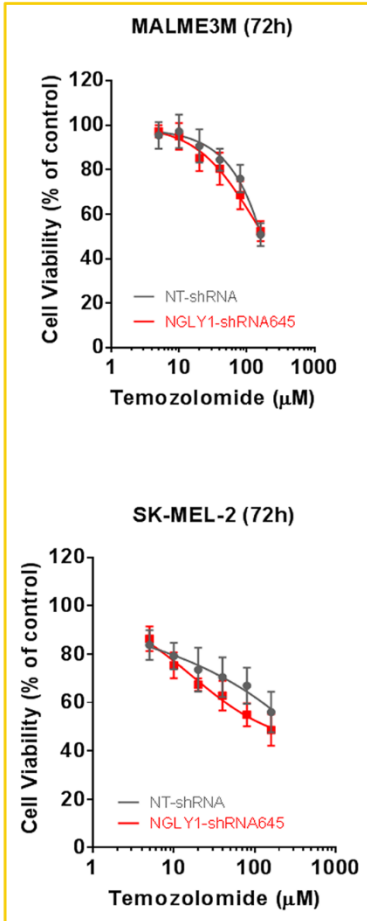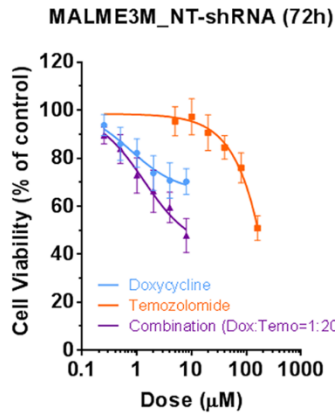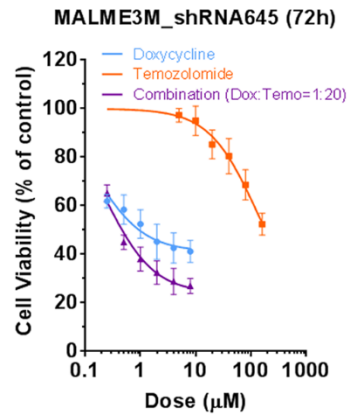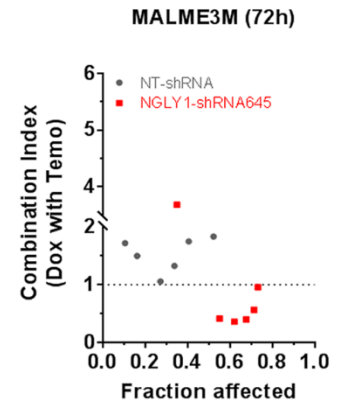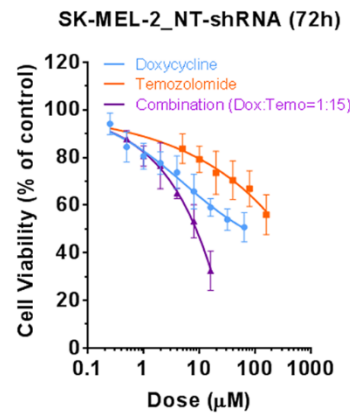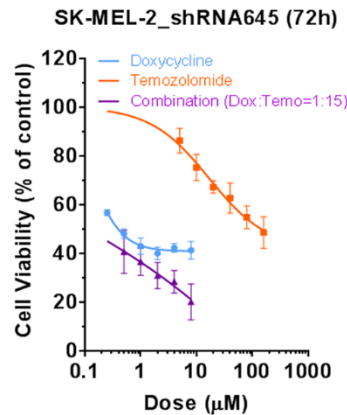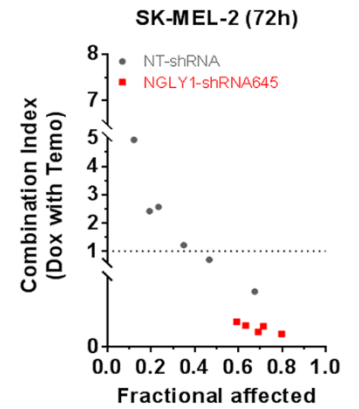

**Supplementary Figure S4.** The synergistic anticancer responses of NGLY1 knockdown and temozolomide treatment in MALME3M and SK-MEL-2 melanoma cells. The calculation of combination indexes was performed using CalcuSyn software. A combination index value  $<1$  was considered synergistic. A combination index value  $<0.2$  was considered highly synergistic. All cell viability data were presented as mean  $\pm$  standard deviation ( $n=3$ ).

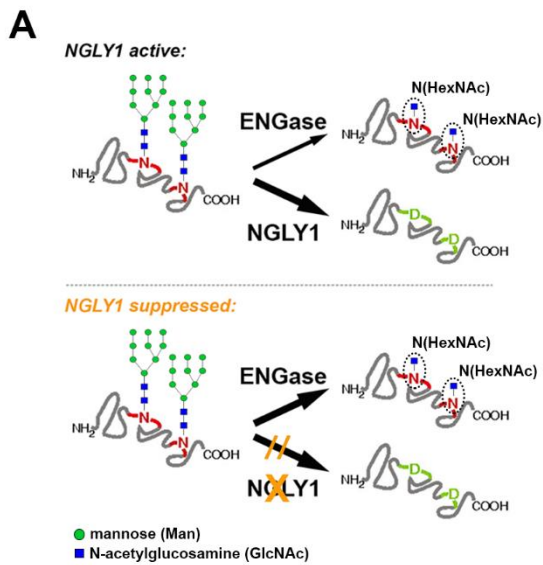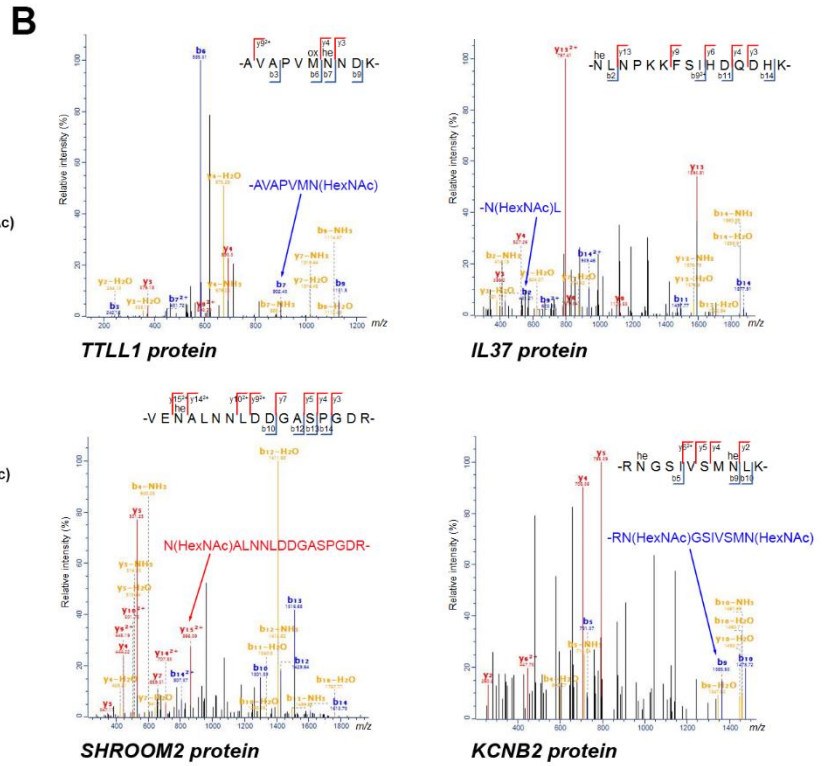

**C**

Mass spec information for GlcNAc modified peptides.

| Modified peptide sequence <sup>a</sup> | Positions within proteins | UniProt accession number | Protein names                                                | Localization prob. <sup>b</sup> | PEP <sup>c</sup> | Charge state | m/z        | Mass error (ppm) | Score <sup>d</sup> |
|----------------------------------------|---------------------------|--------------------------|--------------------------------------------------------------|---------------------------------|------------------|--------------|------------|------------------|--------------------|
| <u>N</u> LNPKKFSIHDDQDHK               | 54                        | Q9NZH6                   | Interleukin-37 (IL37)                                        | 1.0                             | 0.0292           | 2            | 1012.51343 | -1.1             | 56.3               |
| <u>R</u> NGSIVSM <u>N</u> LK           | 446                       | Q92953                   | Potassium voltage-gated channel subfamily B member 2 (KCNB2) | 1.0                             | 0.0342           | 2            | 812.914169 | -0.9             | 40.2               |
| <u>R</u> NGSIVSM <u>N</u> LK           | 453                       | Q92953                   | Potassium voltage-gated channel subfamily B member 2(KCNB2)  | 1.0                             | 0.0342           | 2            | 812.914169 | -0.9             | 40.2               |
| <u>A</u> VAPVM <u>N</u> NDK            | 301                       | O95922                   | Probable tubulin polyglutamylase TLLL1 (TLLL1)               | 1.0                             | 0.0209           | 2            | 639.305735 | -1.1             | 76.2               |
| <u>V</u> ENALNLLDGGASPGDR              | 1514                      | Q13796                   | Protein Shroom2 (SHROOM2)                                    | 0.6                             | 0.0123           | 2            | 980.448147 | 1.7              | 73.3               |

a: Underlined amino acid was GlcNAc modified

b: Localization probability calculated by MaxQuant. Value less than 0.75 was considered true positive

c: Posterior Error Probability (PEP<sub>i</sub>) of the identification, it is basically treated as p-value where less 0.05 was considered significant

d: Andromeda score for the best associated MS/MS spectrum, where higher is better.

**D**

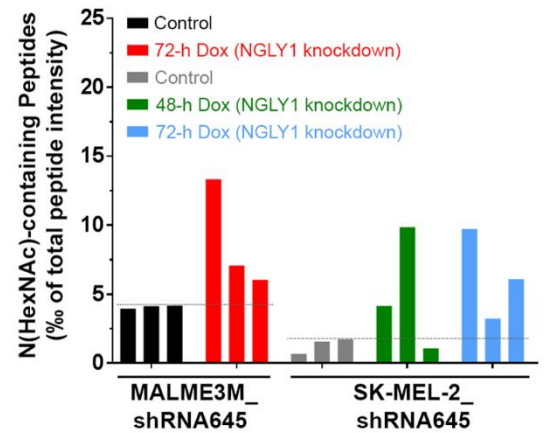



**Supplementary Figure S5. Melanoma cells with the shRNA-mediated suppression of NGLY1 presented characteristic alterations in proteomics analysis.** NGLY1 knockdown induced the increase of peptides containing GlcNAc-asparagine residues and additional perturbation in the proteomes of MALME3M and SK-MEL-2 cells with inducible shRNA targeting NGLY1. **(A)** Schematic illustration of enhanced ENGase-mediated formation of peptides containing GlcNAc-asparagine residues in the absence of NGLY1 in cells. **(B)** The MS/MS spectrum of tryptic peptide ions containing GlcNAc-asparagine residues annotated as N(HexNAc) of TTLL1, IL-37, SHROOM2, KCNB2 identified in the protein samples of MALME3M and SK-MEL2 cells with NGLY1 knockdown. **(C)** The mass spec information of representative GlcNAc-modified peptides. **(D)** The proportion of peptides containing GlcNAc-asparagine residues in the proteome of each cell sample was analyzed. The results of 3 biological replicates for each experimental setting were plotted. Prior to sample collection for analysis, 1 $\mu$ M doxycycline (dox) was used to treat cells for the indicated periods.

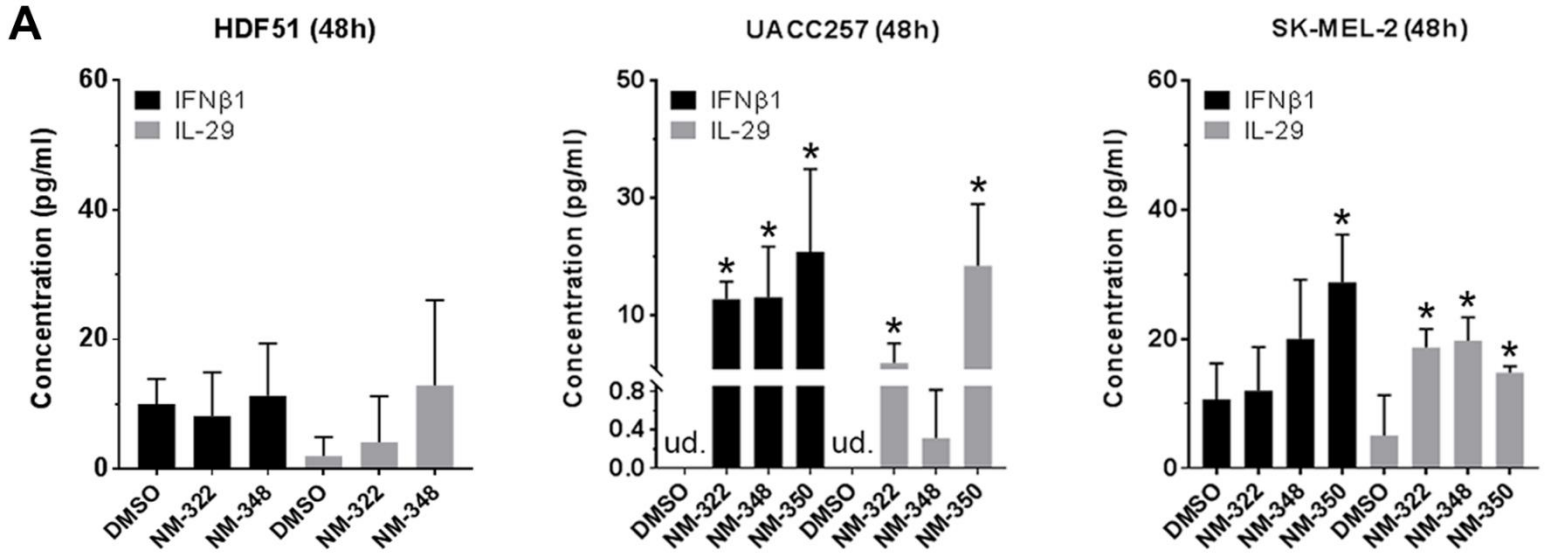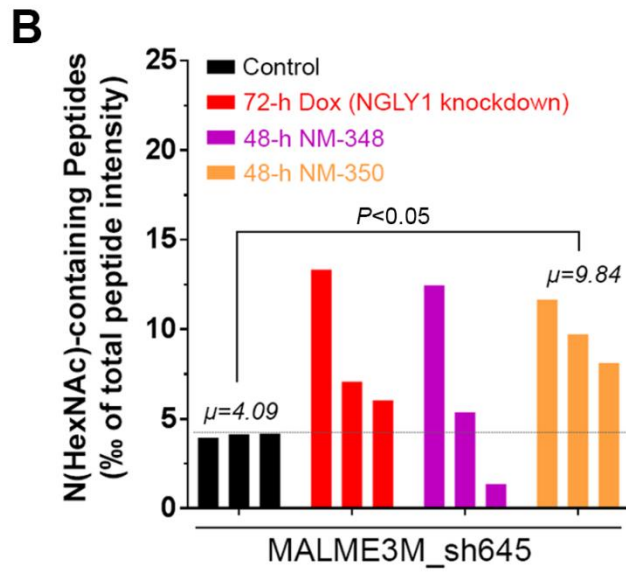

**Supplementary Figure S6.** The cytokine responses and glycopeptide features of melanoma cells treated with novel NGLY1 inhibitors. **(A)** The production of IFN $\beta$ 1 and IL-29 was enhanced by novel small-molecule inhibitors targeting NGLY1. HDF51, UACC257, and SK-MEL-2 cells were treated using the indicated inhibitors. The conditional media of the cells were collected for cytokine analysis at the end of 48-hour drug treatment. The concentration of each inhibitor used in the test was 200 $\mu$ M. The data of cytokine analysis were presented as mean  $\pm$  standard deviation ( $n=3$ , \* $P<0.05$ , t-test; ud., undetectable). **(B)** The proportion of peptides containing GlcNAc-asparagine residues in the proteome of each cell sample was analyzed. The results of 3 biological replicates for each experimental setting were plotted. Prior to sample collection for analysis, 1 $\mu$ M doxycycline (dox), 200 $\mu$ M NM-348 or 200 $\mu$ M NM-350 was used to treat cells for the indicated periods.

**A**

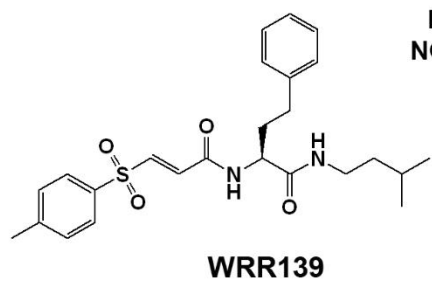

Docked to the human  
NGLY1 homology model

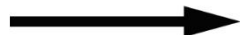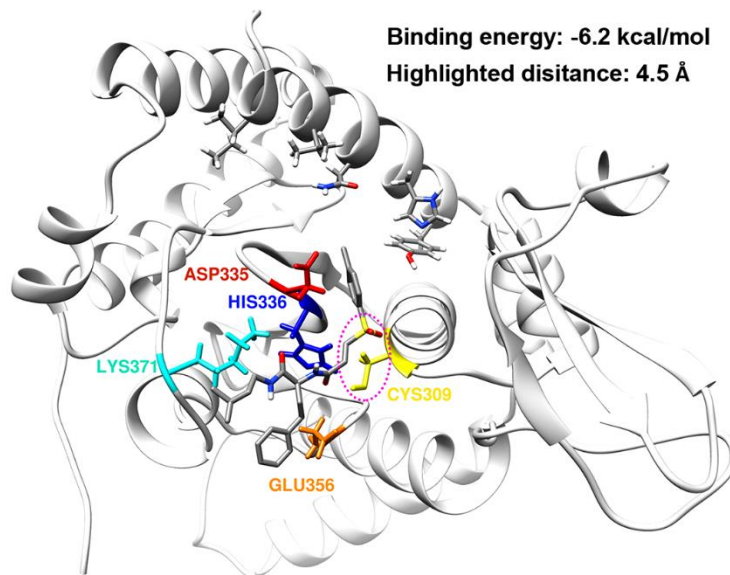

**B**

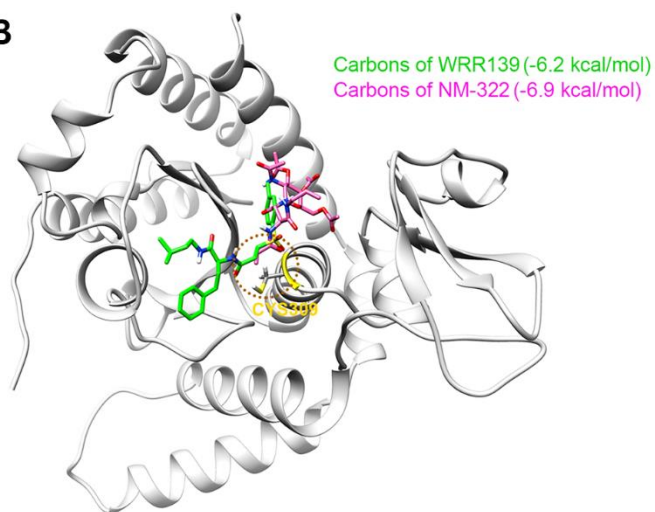

**Supplementary Figure S7.** The binding poses of NGLY1 inhibitors WRR139 and NM-322 in the human NGLY1 homology model. **(A)** The most favorable binding pose of WRR139, a small molecule that has been shown to have NGLY1 inhibitory activity in cancer cells, in the homology model of human NGLY1 showed a good binding affinity with its electrophilic group pointed towards Cys309 in close proximity at the human NGLY1 catalytic site. **(B)** The distinct binding poses of WRR139 and NM-322 in the homology model of human NGLY1.

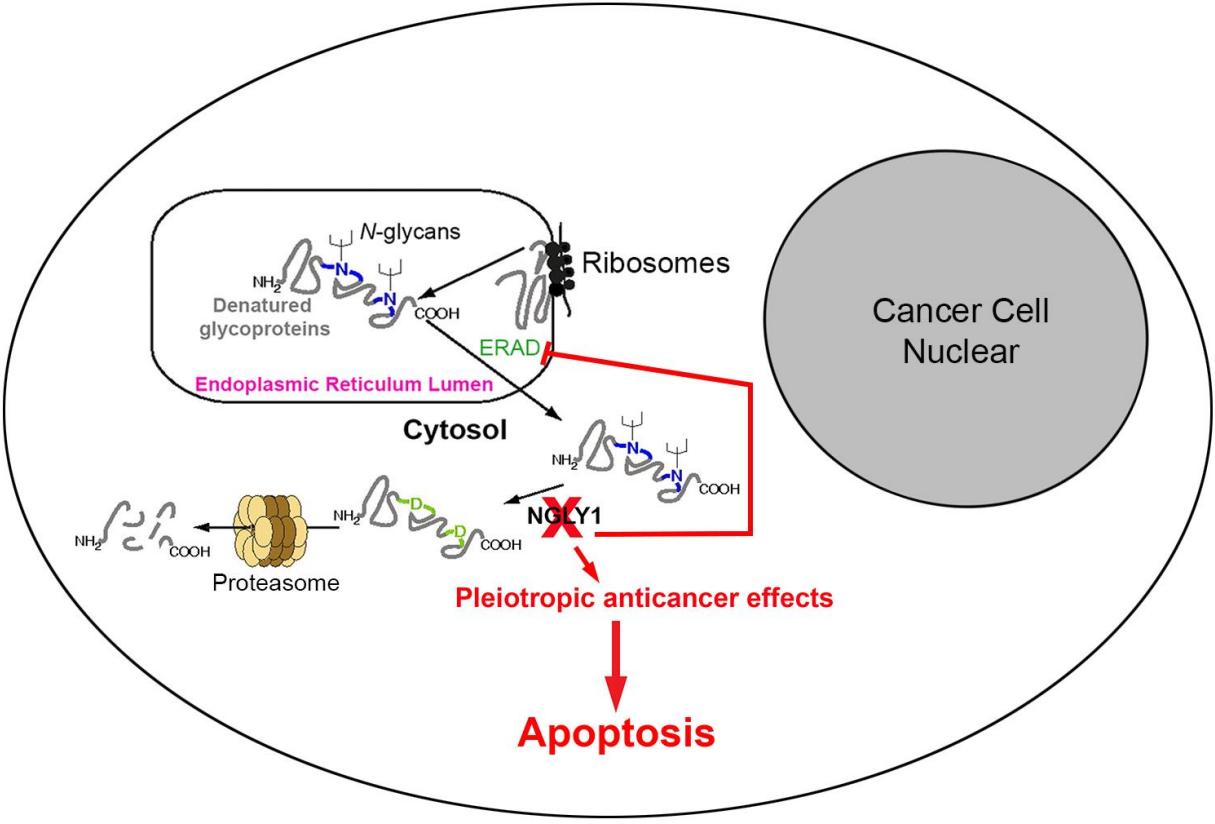

**Supplementary Figure S8.** The graphic summary of NGLY1 suppression-triggered anticancer responses in melanoma cells.

| <b>Supplementary Table S1. The list of cultured cells used in the study</b> |                                  |                                                                                                                                                                                     |
|-----------------------------------------------------------------------------|----------------------------------|-------------------------------------------------------------------------------------------------------------------------------------------------------------------------------------|
| <b>Sample Name</b>                                                          | <b>Registry Name<sup>a</sup></b> | <b>Note<sup>b</sup></b>                                                                                                                                                             |
| <b>Human embryonic stem cells</b>                                           |                                  |                                                                                                                                                                                     |
| WA09                                                                        | WA09                             | Obtained from the WiCell Stem Cell Bank; feeder cell-free culture on Matrigel, passaged using L7 hPSC passaging solution                                                            |
| <b>Induced pluripotent stem cells from Human Dermal Fibroblasts (HDF)</b>   |                                  |                                                                                                                                                                                     |
| NGLY1Pt1i-507                                                               | N/A                              | Sendai virus-mediated reprogramming in NGLY1-deficient patient's dermal fibroblasts (GM25990); feeder cell-free culture on Matrigel, passaged using L7 hPSC passaging solution      |
| NGLY1Pt1i-508                                                               | N/A                              | Sendai virus-mediated reprogramming in NGLY1-deficient patient's dermal fibroblasts (GM25990); feeder cell-free culture on Matrigel, passaged using L7 hPSC passaging solution      |
| NGLY1Pt1i-509                                                               | N/A                              | Sendai virus-mediated reprogramming in NGLY1-deficient patient's dermal fibroblasts (GM25990); feeder cell-free culture on Matrigel, passaged using L7 hPSC passaging solution      |
| <b>Normal somatic cells</b>                                                 |                                  |                                                                                                                                                                                     |
| HDF51 (HDF-f) <sup>c</sup>                                                  | N/A                              | Human dermal fibroblasts, fetal skin; purchased from Sciencell                                                                                                                      |
| HM (HEMI) <sup>c</sup>                                                      | N/A                              | Human epidermal melanocytes (light), neonatal skin; purchased from Sciencell                                                                                                        |
| HEMd                                                                        | N/A                              | Human epidermal melanocytes (dark), neonatal skin; purchased from Sciencell                                                                                                         |
| HDF418                                                                      | N/A                              | Human dermal fibroblasts; isolated from the forearm skin biopsy sample of an adult male                                                                                             |
| <b>Cancer cells</b>                                                         |                                  |                                                                                                                                                                                     |
| UACC257                                                                     | N/A                              | Human melanoma cells cultured using RPMI-1640 medium containing 10% FBS, enzymatic passaged using trypsin-EDTA                                                                      |
| COLO829                                                                     | N/A                              | Human melanoma cells cultured using RPMI-1640 medium containing 10% FBS, enzymatic passaged using trypsin-EDTA                                                                      |
| SK-MEL-2                                                                    | N/A                              | Human melanoma cells cultured using RPMI-1640 medium containing 10% FBS, enzymatic passaged using trypsin-EDTA                                                                      |
| SK-MEL-5                                                                    | N/A                              | Human melanoma cells cultured using RPMI-1640 medium containing 10% FBS, enzymatic passaged using trypsin-EDTA                                                                      |
| 451Lu                                                                       | N/A                              | Human melanoma cells cultured using RPMI-1640 medium containing 10% FBS, enzymatic passaged using trypsin-EDTA                                                                      |
| MEL1617                                                                     | N/A                              | Human melanoma cells cultured using RPMI-1640 medium containing 10% FBS, enzymatic passaged using trypsin-EDTA                                                                      |
| MALME3M                                                                     | N/A                              | Human melanoma cells cultured using DMEM medium containing 10% FBS, enzymatic passaged using trypsin-EDTA                                                                           |
| <b>Cells used for reprogramming</b>                                         |                                  |                                                                                                                                                                                     |
| HDF (GM25990)                                                               | N/A                              | Human dermal fibroblasts derived from the skin biopsy sample of a patient with NGLY1 deficiency, cultured using DMEM medium containing 10% FBS, obtained from Coriell Biorepository |

- a. Name of cell line submitted to University of Massachusetts (UMass) International Stem Cell Registry  
b. Somatic cell type, reprogramming method, culture condition, source of cells  
c. Nomenclature used by the vendor



| <b>Supplementary Table S2. The list of primary antibodies and lectin used in the study</b> |                       |                              |
|--------------------------------------------------------------------------------------------|-----------------------|------------------------------|
| <b>Antibody/Lectin Name</b>                                                                | <b>Catalog Number</b> | <b>Sources</b>               |
| <b>Antibodies used in IHC or fluorescence staining</b>                                     |                       |                              |
| NGLY1                                                                                      | HPA036825             | Millipore Sigma              |
| TRA-1-81                                                                                   | 09-0011               | Stemgent                     |
| POU5F1                                                                                     | 2840                  | Cell Signaling Technology    |
| NANOG                                                                                      | MABD24                | Millipore Sigma              |
| TUBB3                                                                                      | MRB-435P              | Biologend (formerly Covance) |
| Smooth Muscle Actin (SMA)                                                                  | MAB1420               | R&D Systems                  |
| SOX17                                                                                      | AF1924                | R&D Systems                  |
| DYKDDDDK Tag                                                                               | MA1-142-A555          | Thermo Fisher Scientific     |
| Brachyury                                                                                  | sc-17745              | Santa Cruz Biotechnology     |
| <b>Antibodies used in immunoblotting</b>                                                   |                       |                              |
| NGLY1                                                                                      | HPA036825             | Millipore Sigma              |
| pMEK1/2                                                                                    | 9154                  | Cell Signaling Technology    |
| MEK1/2                                                                                     | 4694                  | Cell Signaling Technology    |
| pERK1/2                                                                                    | 4370                  | Cell Signaling Technology    |
| ERK1/2                                                                                     | 4696                  | Cell Signaling Technology    |
| ACTIN                                                                                      | 08691001              | MP Biomedicals               |
| POU5F1                                                                                     | 2840                  | Cell Signaling Technology    |
| NANOG                                                                                      | MABD24                | Millipore Sigma              |
| DYKDDDDK Tag                                                                               | 8146                  | Cell Signaling Technology    |
| GADD153                                                                                    | NB600-1335            | Novus Biologicals            |
| pIRF3                                                                                      | 4947                  | Cell Signaling Technology    |
| IRF3                                                                                       | 11904                 | Cell Signaling Technology    |
| IRF7                                                                                       | 13014                 | Cell Signaling Technology    |
| pTBK1                                                                                      | 5483                  | Cell Signaling Technology    |
| TBK1                                                                                       | 3504                  | Cell Signaling Technology    |
| Ubiquitin                                                                                  | 3936                  | Cell Signaling Technology    |
| KDEL                                                                                       | ab12223               | Abcam                        |
| ATF4                                                                                       | 11815                 | Cell Signaling Technology    |
| TCF11/NRF1                                                                                 | 8052                  | Cell Signaling Technology    |
| ZsGreen                                                                                    | 632598                | Takara                       |
| p-eIF2 $\alpha$                                                                            | ab32157               | Abcam                        |
| eIF2 $\alpha$                                                                              | 9722                  | Cell Signaling Technology    |
| ATF6                                                                                       | 65880                 | Cell Signaling Technology    |
| XBP1                                                                                       | GTX102229             | GeneTex                      |
| p-PKR                                                                                      | ab32036               | Abcam                        |
| PKR                                                                                        | ab32506               | Abcam                        |
| p-PERK                                                                                     | ab192591              | Abcam                        |
| PERK                                                                                       | 3192                  | Cell Signaling Technology    |
| <b>Cytokine neutralization</b>                                                             |                       |                              |
| IFN $\beta$ 1                                                                              | MAB814-100            | R&D Systems                  |
| IL-29                                                                                      | MAB15981-100          | R&D Systems                  |
| <b>Lectin used in fluorescence staining</b>                                                |                       |                              |
| UEA-I                                                                                      | FL-1061               | Vector Laboratories          |

**Supplementary Table S3. Immunohistochemistry staining intensity of NGLY1 in human normal skin and melanoma tissues**

| <b>Pathology (# of Cases)</b>   | <b>Negative (% of total cases)</b> | <b>Weak (% of total cases)<sup>a</sup></b> | <b>Moderate (% of total cases)<sup>a</sup></b> | <b>Strong (% of total cases)<sup>a</sup></b> |
|---------------------------------|------------------------------------|--------------------------------------------|------------------------------------------------|----------------------------------------------|
| Normal skin or benign nevus (8) | 8 (100)                            | 0 (0)                                      | 0 (0)                                          | 0 (0)                                        |
| Melanoma (33) <sup>b</sup>      | 19 (57.6)                          | 7 (21.2)                                   | 6 (18.2)                                       | 1 (3.0)                                      |

<sup>a</sup> A tissue sample showing either weak, moderate and strong staining of NGLY1 is considered as NGLY1 positive. NGLY1-positive staining is associated with melanoma pathology ( $P=0.035$ , 2x2 contingency table, Fisher's exact test).

<sup>b</sup> The tumor sample from 1 of 36 melanoma patients was lost during the staining process. Since no visible cancer cell was found in the lymph node tissue samples supposed to contain metastatic melanoma cells of two patients, these two patients were excluded from analysis.

Supplementary Table S4. NGLY1 inactivation-induced alterations in protein abundance detected by proteomics analysis

| Protein IDs                                                                                                | Genes                                   | MALME3M                                 |                                          |                                     | SK-MEL-2                                |                                          |                                     |
|------------------------------------------------------------------------------------------------------------|-----------------------------------------|-----------------------------------------|------------------------------------------|-------------------------------------|-----------------------------------------|------------------------------------------|-------------------------------------|
|                                                                                                            |                                         | Avg. % of total peptides (Control, n=3) | Avg. % of total peptides (NGLY1-KD, n=3) | Abundance fold change (KD/Control)* | Avg. % of total peptides (Control, n=3) | Avg. % of total peptides (NGLY1-KD, n=3) | Abundance fold change (KD/Control)* |
| <b>Proteins with increased abundance commonly found in MALME3M and SK-MEL-2 cells with NGLY1 knockdown</b> |                                         |                                         |                                          |                                     |                                         |                                          |                                     |
| P62937; Q9Y536                                                                                             | PPIA                                    | 1.3637                                  | 1.6296                                   | 1.1950                              | 1.2622                                  | 4.4404                                   | 3.5180                              |
| P49903                                                                                                     | SEPHS1                                  | 0.0000                                  | 0.0121                                   | n.d. in control samples             | 0.0154                                  | 0.0397                                   | 2.5857                              |
| Q71U36; P68363; Q13748; P68366; Q6PEY2                                                                     | TUBA1A; TUBA1B; TUBA3C; TUBA4A          | 1.9826                                  | 2.4477                                   | 1.2346                              | 1.5769                                  | 3.7260                                   | 2.3628                              |
| P21796                                                                                                     | VDAC1#                                  | 0.0696                                  | 0.1067                                   | 1.5331                              | 0.1777                                  | 0.4163                                   | 2.3423                              |
| Q7KZF4                                                                                                     | SND1                                    | 0.2903                                  | 0.3381                                   | 1.1646                              | 0.2098                                  | 0.3684                                   | 1.7558                              |
| Q5VTE0; P68104; Q05639                                                                                     | EEF1A1P5; EEF1A1; EEF1A2                | 2.1861                                  | 2.6168                                   | 1.1970                              | 2.0729                                  | 3.5754                                   | 1.7248                              |
| P25705                                                                                                     | ATP5A1                                  | 0.3353                                  | 0.6229                                   | 1.8579                              | 0.1367                                  | 0.2250                                   | 1.6451                              |
| P63261; P60709; P63267; P68133; P68032; P62736                                                             | ACTG1; ACTB; ACTG2; ACTA1; ACTC1; ACTA2 | 15.8514                                 | 19.9151                                  | 1.2564                              | 12.4899                                 | 20.5437                                  | 1.6448                              |
| P30101                                                                                                     | PDI A3                                  | 0.8989                                  | 1.4247                                   | 1.5849                              | 0.4545                                  | 0.7444                                   | 1.6379                              |
| P10809                                                                                                     | HSPD1#                                  | 1.9390                                  | 2.3958                                   | 1.2356                              | 1.8716                                  | 2.8825                                   | 1.5401                              |
| O43707                                                                                                     | ACTN4                                   | 0.3716                                  | 0.5029                                   | 1.3533                              | 0.4010                                  | 0.6119                                   | 1.5258                              |
| P50991                                                                                                     | CCT4                                    | 0.2826                                  | 0.4360                                   | 1.5428                              | 0.3104                                  | 0.4672                                   | 1.5052                              |
| P49006                                                                                                     | MARCKSL1                                | 0.5431                                  | 0.6807                                   | 1.2533                              | 0.4021                                  | 0.4889                                   | 1.2160                              |
| Q8NC51                                                                                                     | SERBP1                                  | 0.3675                                  | 0.5570                                   | 1.5155                              | 0.4059                                  | 0.4819                                   | 1.1871                              |
| Q15942                                                                                                     | ZYX                                     | 0.0284                                  | 0.1168                                   | 4.1198                              | 0.0282                                  | 0.0322                                   | 1.1419                              |
| Q96QR8                                                                                                     | PURB                                    | 0.0230                                  | 0.0302                                   | 1.3177                              | 0.0370                                  | 0.0411                                   | 1.1104                              |
| <b>Proteins with reduced abundance commonly found in MALME3M and SK-MEL-2 cells with NGLY1 knockdown</b>   |                                         |                                         |                                          |                                     |                                         |                                          |                                     |
| P14314                                                                                                     | PRKCSH                                  | 0.1371                                  | 0.0000                                   | n.d. in NGLY1-KD samples            | 0.5048                                  | 0.4438                                   | 0.8792                              |
| P08670                                                                                                     | VIM#                                    | 9.4669                                  | 6.9682                                   | 0.7361                              | 6.3892                                  | 4.9337                                   | 0.7722                              |
| P61978                                                                                                     | HNRNPK                                  | 0.3374                                  | 0.2840                                   | 0.8418                              | 0.4715                                  | 0.3634                                   | 0.7706                              |
| P16949                                                                                                     | STMN1                                   | 0.1663                                  | 0.0000                                   | n.d. in NGLY1-KD samples            | 0.2708                                  | 0.2026                                   | 0.7482                              |
| P55072                                                                                                     | VCP#                                    | 0.2390                                  | 0.1532                                   | 0.6412                              | 0.2363                                  | 0.1755                                   | 0.7428                              |
| Q99714                                                                                                     | HSD17B10                                | 0.0246                                  | 0.0000                                   | n.d. in NGLY1-KD samples            | 0.0513                                  | 0.0331                                   | 0.6443                              |
| P11021                                                                                                     | HSPA5 (GRP78)                           | 0.4052                                  | 0.2222                                   | 0.5485                              | 0.5763                                  | 0.3493                                   | 0.6062                              |
| P14625; Q58FF3                                                                                             | HSP90B1 (GRP94)                         | 0.6381                                  | 0.2500                                   | 0.3918                              | 0.2317                                  | 0.1370                                   | 0.5914                              |
| P35268                                                                                                     | RPL22                                   | 0.3121                                  | 0.2614                                   | 0.8377                              | 0.4938                                  | 0.2506                                   | 0.5075                              |
| Q5JTV8                                                                                                     | TOR1AIP1                                | 0.0220                                  | 0.0000                                   | n.d. in NGLY1-KD samples            | 0.0031                                  | 0.0000                                   | n.d. in NGLY1-KD samples            |
| P34932                                                                                                     | HSPA4                                   | 0.0063                                  | 0.0000                                   | n.d. in NGLY1-KD samples            | 0.0063                                  | 0.0000                                   | n.d. in NGLY1-KD samples            |
| P52907                                                                                                     | CAPZA1                                  | 0.0123                                  | 0.0000                                   | n.d. in NGLY1-KD samples            | 0.0109                                  | 0.0000                                   | n.d. in NGLY1-KD samples            |
| Q01082                                                                                                     | SPTBN1                                  | 0.0369                                  | 0.0000                                   | n.d. in NGLY1-KD samples            | 0.0115                                  | 0.0000                                   | n.d. in NGLY1-KD samples            |
| Q14847                                                                                                     | LASP1                                   | 0.0313                                  | 0.0000                                   | n.d. in NGLY1-KD samples            | 0.0198                                  | 0.0000                                   | n.d. in NGLY1-KD samples            |
| P40925                                                                                                     | MDH1                                    | 0.1165                                  | 0.0000                                   | n.d. in NGLY1-KD samples            | 0.0219                                  | 0.0000                                   | n.d. in NGLY1-KD samples            |
| P46779                                                                                                     | RPL28                                   | 0.0293                                  | 0.0000                                   | n.d. in NGLY1-KD samples            | 0.0296                                  | 0.0000                                   | n.d. in NGLY1-KD samples            |
| P13667                                                                                                     | PDI A4                                  | 0.2196                                  | 0.0000                                   | n.d. in NGLY1-KD samples            | 0.0362                                  | 0.0000                                   | n.d. in NGLY1-KD samples            |
| P35527; CON_P35527                                                                                         | KRT9                                    | 0.0783                                  | 0.0000                                   | n.d. in NGLY1-KD samples            | 0.0640                                  | 0.0000                                   | n.d. in NGLY1-KD samples            |
| P06454                                                                                                     | PTMA                                    | 0.0983                                  | 0.0442                                   | 0.4497                              | 0.0767                                  | 0.0000                                   | n.d. in NGLY1-KD samples            |
| P62829                                                                                                     | RPL23                                   | 0.0742                                  | 0.0000                                   | n.d. in NGLY1-KD samples            | 0.1392                                  | 0.0000                                   | n.d. in NGLY1-KD samples            |
| P62805                                                                                                     | HIST1H4A (histone H4)                   | 1.2159                                  | 0.2125                                   | 0.1748                              | 0.4122                                  | 0.0000                                   | n.d. in NGLY1-KD samples            |

Genes highlighted in red showed increased abundance in SK-MEL-2 cells with the 48-hour treatment of 200µM NM-350, in comparison with control cells.

Genes highlighted in blue showed reduced abundance in SK-MEL-2 cells with the 48-hour treatment of 200µM NM-350, in comparison with control cells.

\* n.d., non-detectable.

# Less than 10% of abundance fold changes in SK-MEL-2 cells with the 48-hour treatment of 200µM NM-350, in comparison with control cells

**Supplementary Table S5. Differentially expressed genes ( $P < 0.05$  & Average fold change  $\geq 2$ ) in human melanoma cells with NGLY1 knockdown**

| gene probe # | Gene name <sup>a</sup> | Average fold change (log2) <sup>b</sup> | P value   |
|--------------|------------------------|-----------------------------------------|-----------|
| 13           | ATF3                   | 1.568                                   | 0.0016611 |
| 36           | AXUD1                  | 1.252                                   | 0.0004843 |
| 57           | BEX2                   | 1.112                                   | 0.0114698 |
| 51           | BIRC3                  | 1.132                                   | 0.0198327 |
| 6            | CCL5                   | 2.125                                   | 0.0047061 |
| 4            | CCL5                   | 2.369                                   | 0.0012786 |
| 74           | CDCA7                  | -1.035                                  | 0.0046373 |
| 68           | CDKN2C                 | 1.058                                   | 0.0276974 |
| 44           | CENTA1                 | 1.162                                   | 0.0010219 |
| 53           | CFB                    | 1.122                                   | 0.0392379 |
| 78           | CRYAB                  | -1.015                                  | 0.0098900 |
| 65           | DDIT3                  | 1.062                                   | 0.0105068 |
| 56           | DDX58                  | 1.113                                   | 0.0008328 |
| 25           | DHX58                  | 1.354                                   | 0.0000114 |
| 28           | EGR1                   | 1.328                                   | 0.0001190 |
| 38           | EGR2                   | 1.223                                   | 0.0004354 |
| 12           | EPST11                 | 1.584                                   | 0.0010029 |
| 48           | FABP7                  | -1.133                                  | 0.0022050 |
| 84           | FOS                    | 0.999                                   | 0.0013192 |
| 59           | GAPDHS                 | -1.101                                  | 0.0327541 |
| 37           | GBP1                   | 1.249                                   | 0.0014629 |
| 63           | GPM6B                  | -1.072                                  | 0.0100371 |
| 1            | HCP5                   | 2.630                                   | 0.0015499 |
| 52           | HERC5                  | 1.127                                   | 0.0000739 |
| 8            | HLA-B                  | 1.951                                   | 0.0002007 |
| 30           | HLA-C                  | 1.303                                   | 0.0020300 |
| 61           | HLA-F                  | 1.098                                   | 0.0114828 |
| 15           | HLA-F                  | 1.491                                   | 0.0000087 |
| 43           | HMGCL                  | 1.174                                   | 0.0001207 |
| 35           | IFI44                  | 1.261                                   | 0.0000125 |
| 31           | IFI44L                 | 1.277                                   | 0.0024527 |
| 18           | IFIH1                  | 1.478                                   | 0.0000116 |
| 49           | IFIT1                  | 1.133                                   | 0.0005623 |
| 29           | IFIT1                  | 1.313                                   | 0.0007546 |
| 7            | IFIT2                  | 1.997                                   | 0.0010418 |
| 10           | IFIT3                  | 1.724                                   | 0.0001275 |
| 9            | IFIT3                  | 1.922                                   | 0.0000341 |
| 23           | IFITM1                 | 1.407                                   | 0.0037163 |
| 2            | IFNB1                  | 2.436                                   | 0.0017186 |
| 27           | IL29                   | 1.335                                   | 0.0054003 |
| 83           | IL8                    | 1.002                                   | 0.0422249 |
| 33           | IRF1                   | 1.272                                   | 0.0039862 |
| 85           | IRF7                   | 0.996                                   | 0.0004498 |
| 46           | IRF7                   | 1.154                                   | 0.0003181 |
| 34           | ISG15                  | 1.263                                   | 0.0003385 |
| 21           | KLF4                   | 1.428                                   | 0.0013494 |
| 41           | LOC100008588           | -1.177                                  | 0.0371693 |
| 19           | LOC100132564           | 1.475                                   | 0.0073257 |
| 45           | LOC100133565           | -1.154                                  | 0.0022528 |
| 17           | NGLY1                  | -1.481                                  | 0.0000005 |
| 26           | OAS1                   | 1.338                                   | 0.0000529 |
| 22           | OAS1                   | 1.421                                   | 0.0000192 |
| 70           | OAS2                   | 1.045                                   | 0.0001903 |
| 54           | OAS2                   | 1.119                                   | 0.0003339 |
| 67           | OAS3                   | 1.060                                   | 0.0001514 |
| 16           | OASL                   | 1.485                                   | 0.0005257 |
| 5            | OASL                   | 2.274                                   | 0.0000435 |
| 76           | PARP12                 | 1.023                                   | 0.0079003 |
| 58           | PARP9                  | 1.101                                   | 0.0000546 |
| 11           | PMAIP1                 | 1.660                                   | 0.0006323 |
| 39           | PSMB9                  | 1.213                                   | 0.0049945 |
| 24           | PTGS2                  | 1.394                                   | 0.0099303 |
| 77           | RARRES3                | 1.022                                   | 0.0000657 |
| 32           | RN5S9                  | 1.274                                   | 0.0325331 |
| 3            | RSAD2                  | 2.411                                   | 0.0000004 |
| 71           | RTP4                   | 1.045                                   | 0.0002050 |
| 62           | SAMD9                  | 1.078                                   | 0.0005239 |
| 40           | SAMD9L                 | 1.204                                   | 0.0020208 |
| 81           | SEMA5A                 | -1.006                                  | 0.0287923 |
| 55           | SERTAD1                | 1.117                                   | 0.0013974 |
| 14           | SLC15A3                | 1.500                                   | 0.0004396 |
| 86           | SP110                  | 0.996                                   | 0.0000227 |
| 69           | SP110                  | 1.050                                   | 0.0000635 |
| 42           | SP110                  | 1.175                                   | 0.0000145 |
| 72           | TAP1                   | 1.038                                   | 0.0001089 |
| 64           | TMEM140                | 1.068                                   | 0.0029536 |
| 73           | TNFRSF12A              | 1.037                                   | 0.0453292 |
| 66           | TNFSF10                | 1.061                                   | 0.0145028 |
| 50           | TRIM22                 | 1.133                                   | 0.0020824 |
| 47           | USP18                  | 1.150                                   | 0.0001262 |
| 75           | XAF1                   | 1.033                                   | 0.0028008 |
| 20           | XAF1                   | 1.447                                   | 0.0000637 |
| 79           | ZC3HAV1                | 1.015                                   | 0.0002501 |
| 60           | ZC3HAV1                | 1.100                                   | 0.0000965 |
| 80           | ZNFX1                  | 1.011                                   | 0.0001059 |

<sup>a</sup>The upregulation of genes with gray shading was observed in human melanoma cells in response to IL-29 treatment (Guentenberg, *et al.*, 2010). The expression of genes highlighted in red previously have been linked to anticancer activity (e.g., cell cycle arrest, apoptosis, or mobility suppression in cancer cells), while the expression of genes highlighted in blue have been associated with the survival, proliferation and invasiveness of cancer cells or with a poor prognosis in melanoma patients.

<sup>b</sup>Positive values indicate expression changes in upregulation. Negative values indicate expression changes in downregulation.

## References cited in Supplementary Materials and Methods

- 1 Cox J, Neuhauser N, Michalski A, Scheltema RA, Olsen JV, Mann M. Andromeda: a peptide search engine integrated into the MaxQuant environment. *J Proteome Res* 2011; **10**:1794-1805.
- 2 Dang C-H, Nguyen C-H, Nguyen T-D, Im C. Synthesis and characterization of N-acyl-tetra-O-acyl glucosamine derivatives. *RSC Adv* 2014; **4**:6239-6245.
- 3 Greig IR, Macauley MS, Williams IH, Vocadlo DJ. Probing synergy between two catalytic strategies in the glycoside hydrolase O-GlcNAcase using multiple linear free energy relationships. *Journal of the American Chemical Society* 2009; **131**:13415-13422.
- 4 Premdjee B, Adams AL, Macmillan D. Native N-glycopeptide thioester synthesis through N-->S acyl transfer. *Bioorganic & Medicinal Chemistry Letters* 2011; **21**:4973-4975.
- 5 Tropper FD, Andersson FO, Braun S, Roy R. Phase Transfer Catalysis as a General and Stereoselective Entry into Glycosyl Azides from Glycosyl Halides. *Synthesis* 1992:618-620.
- 6 Biasini M, Bienert S, Waterhouse A *et al.* SWISS-MODEL: modelling protein tertiary and quaternary structure using evolutionary information. *Nucleic Acids Research* 2014.
- 7 Morris GM, Huey R, Lindstrom W *et al.* AutoDock4 and AutoDockTools4: Automated docking with selective receptor flexibility. *Journal of Computational Chemistry* 2009; **30**:2785-2791.
- 8 Trott O, Olson AJ. AutoDock Vina: improving the speed and accuracy of docking with a new scoring function, efficient optimization, and multithreading. *Journal of Computational Chemistry* 2010; **31**:455-461.
